# Supplementary material
Source: Royal Society of Chemistry journal article supplement (doi:10.1039/d5cp04877j)
Supplement: d5cp04877j1.pdf [file d5cp04877j1.pdf]

# Modelling Magnetic Confinement in Two-Dimensional Quantum Dots via Gauge-Invariant Imaginary-Time Propagation

Urvi Mukherjee, Nikhil Yenugu, and Sangita Sen\*

*Indian Institute of Science Education and Research (IISER) Kolkata, Department of  
Chemical Sciences, Mohanpur, West Bengal, 741246, India*

E-mail: sangita.sen@iiserkol.ac.in

## Contents

## Pedagogical Derivation of the Wilson Hamiltonian in Symmetric Gauge

We aim to derive a discrete lattice Hamiltonian for a single charged particle moving in two dimensions under a magnetic field. The continuous Hamiltonian in the presence of a vector potential  $\mathbf{A}(\mathbf{r})$  is:

$$\hat{H} = \frac{1}{2m} (\hat{\mathbf{p}} - q\mathbf{A}(\mathbf{r}))^2 + V(\mathbf{r})$$

where:  $m$  is the particle mass,  $q$  is the electric charge of the particle,  $\hat{\mathbf{p}} = -i\hbar\nabla$  is the momentum operator,  $\mathbf{A}(\mathbf{r})$  is the vector potential,  $V(\mathbf{r})$  is an external scalar potential.

Our goal is to obtain a gauge-invariant lattice version of this Hamiltonian using the Wilson prescription, in particular leading to a discrete Hamiltonian that matches Eq. (7) of

the main manuscript. The space is discretized on a 2D square spatial lattice with uniform spacing  $\Delta x$  along the  $x$ -axis and  $\Delta y$  along the  $y$ -axis. The grid points are labeled by integers  $x, y \in \mathbf{Z}$ , corresponding to physical positions:

$$\mathbf{r} = (x\Delta x, y\Delta y)$$

The wavefunction  $\psi(x, y)$  is now defined on lattice sites  $(x, y)$ .

The second derivative along  $x$  in the absence of a magnetic field is discretized as:

$$\frac{\partial^2 \psi}{\partial x^2} \approx \frac{1}{(\Delta x)^2} [\psi(x+1, y) - 2\psi(x, y) + \psi(x-1, y)]$$

This is the standard finite-difference discretization of the Laplacian. In the presence of a magnetic field, however, this form is not gauge-invariant.

To maintain gauge invariance in a magnetic field, we replace ordinary finite differences with gauge-covariant differences using Wilson line factors (also known as Peierls substitution):

$$U_x(x, y) = \exp \left[ \frac{iq\Delta x}{\hbar} A_x(x, y) \right]$$

$$U_y(x, y) = \exp \left[ \frac{iq\Delta y}{\hbar} A_y(x, y) \right]$$

These link variables transport the wavefunction from neighboring sites with the phase accumulated due to the vector potential.

The covariant second derivative along  $x$ -direction is:

$$D_x^2 \psi(x, y) = \frac{1}{(\Delta x)^2} [2\psi(x, y) - U_x(x, y)\psi(x+1, y) - U_x^\dagger(x-1, y)\psi(x-1, y)]$$

Likewise, the covariant second derivative along  $y$ -direction is:

$$D_y^2\psi(x, y) = \frac{1}{(\Delta y)^2} [2\psi(x, y) - U_y(x, y)\psi(x, y+1) - U_y^\dagger(x, y-1)\psi(x, y-1)]$$

The full lattice Hamiltonian (Wilson Hamiltonian) is:

$$(\hat{H}_{\text{WH}}\psi)(x, y) = -\frac{\hbar^2}{2m} (D_x^2\psi(x, y) + D_y^2\psi(x, y)) + V(x, y)\psi(x, y)$$

Substituting the discrete expressions of  $D_x^2$  and  $D_y^2$ , we obtain:

$$\begin{aligned} (\hat{H}_{\text{WH}}\psi)(x, y) &= \frac{\hbar^2}{2m} \left[ \frac{1}{(\Delta x)^2} (2\psi(x, y) - U_x(x, y)\psi(x+1, y) - U_x^\dagger(x-1, y)\psi(x-1, y)) \right. \\ &\quad \left. + \frac{1}{(\Delta y)^2} (2\psi(x, y) - U_y(x, y)\psi(x, y+1) - U_y^\dagger(x, y-1)\psi(x, y-1)) \right] \\ &\quad + V(x, y)\psi(x, y) \end{aligned}$$

This expression is Hermitian and gauge invariant.

We now compute the matrix elements of the Hamiltonian operator  $\hat{H}_{\text{WH}}$  in the lattice position basis. Let us denote:

$$H_{x_1, y_1; x_2, y_2} = \langle x_1, y_1 | \hat{H}_{\text{WH}} | x_2, y_2 \rangle$$

Using the discrete form from Section 6, we obtain nonzero contributions to  $H_{x_1, y_1; x_2, y_2}$  only for sites that are the same or nearest neighbors:

$$\begin{aligned} H_{x_1, y_1; x_2, y_2} &= \left[ \frac{\hbar^2}{2m} \left( \frac{2}{(\Delta x)^2} + \frac{2}{(\Delta y)^2} \right) + V(x_1, y_1) \right] \delta_{x_1, x_2} \delta_{y_1, y_2} \\ &\quad - \frac{\hbar^2}{2m(\Delta x)^2} [U_x(x_1, y_1)\delta_{x_1+1, x_2} + U_x^\dagger(x_2, y_2)\delta_{x_1-1, x_2}] \delta_{y_1, y_2} \\ &\quad - \frac{\hbar^2}{2m(\Delta y)^2} [U_y(x_1, y_1)\delta_{y_1+1, y_2} + U_y^\dagger(x_2, y_2)\delta_{y_1-1, y_2}] \delta_{x_1, x_2} \end{aligned}$$

This matrix element clearly connects to the earlier expression of the action of  $\hat{H}_{\text{WH}}$  on  $\psi(x, y)$ , and provides the link to the full Hamiltonian matrix used for diagonalization.

## 1 Wavefunctions of 2D Harmonic Oscillator system

The probability density, real and imaginary parts of the first six numerically obtained (on a 240 nm x 240 nm grid, with 65 x 65 grid points) eigenfunctions of the system of a single electron (charge  $q = -e$ , where  $e$  is the elementary charge) in GaAs (effective mass  $m = 0.067m_e$ , where  $m_e$  is the rest mass of the electron), in a confining potential of  $\hbar\omega_0 = 4$  meV, varying magnetic field strength (B (T) = 0, 1, 2, 3, 4, 5) is calculated.

## 1.1 Analytic

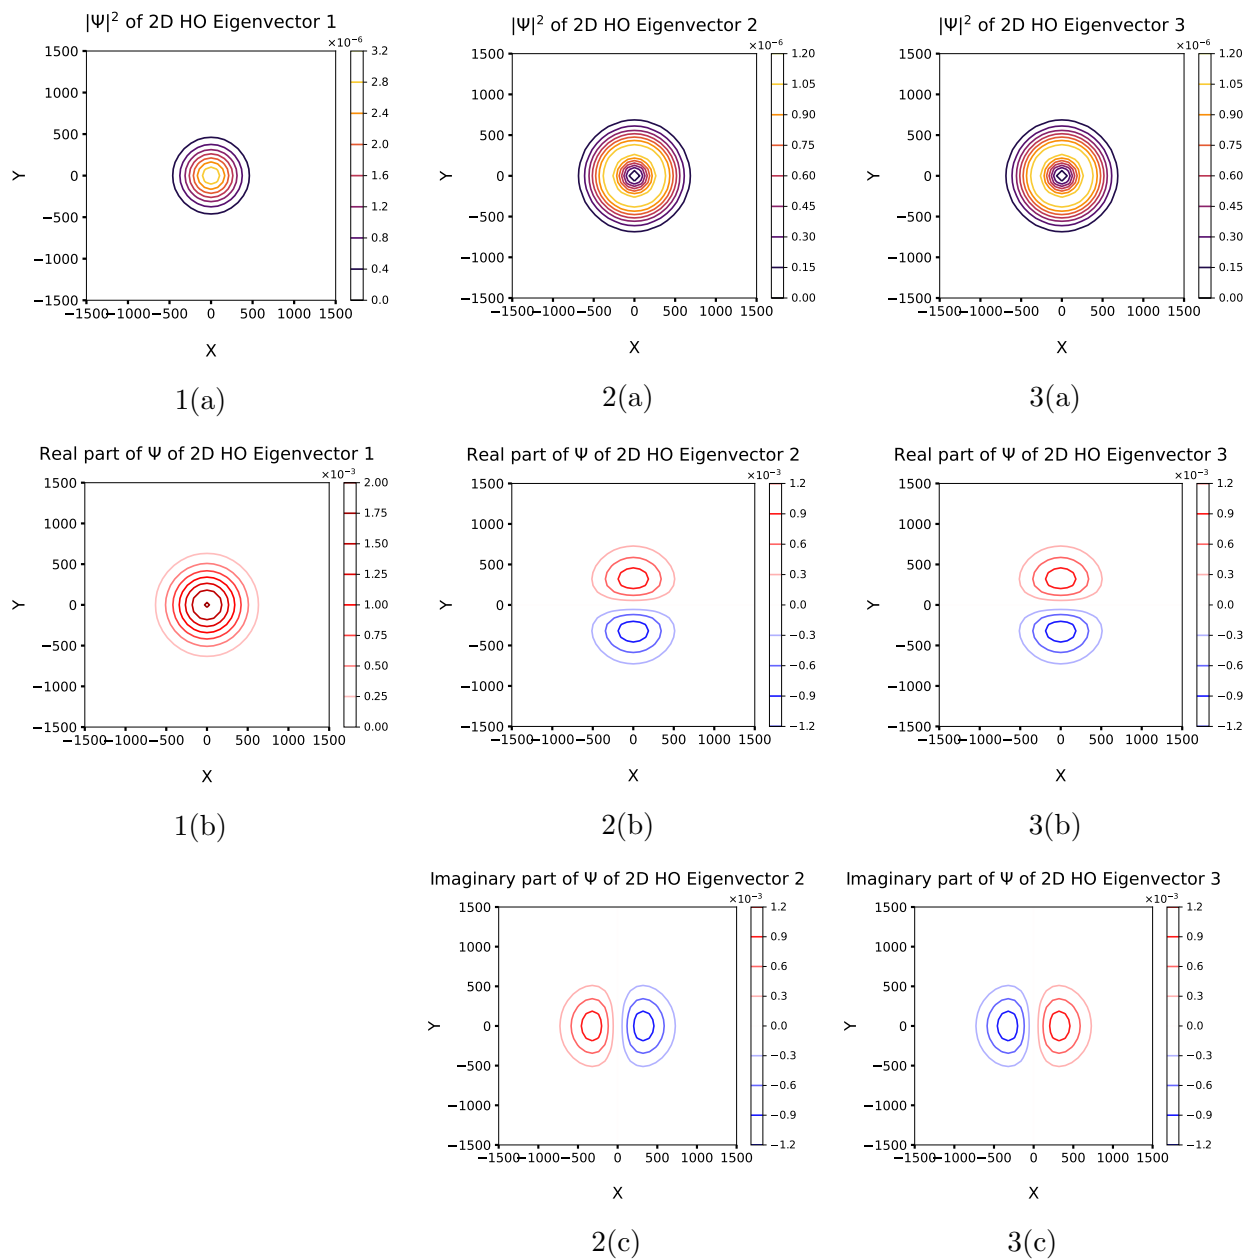

Figure 1: The (a) probability density, (b) real component and (c) phase of the analytical wavefunctions calculated using the ITEM at 65 grid points, in the absence of a uniform perpendicular magnetic field. The quantum numbers  $(n, M)$  of the eigenvectors are: 1.  $(0, 0)$ , 2.  $(0, -1)$ , 3.  $(0, 1)$ .

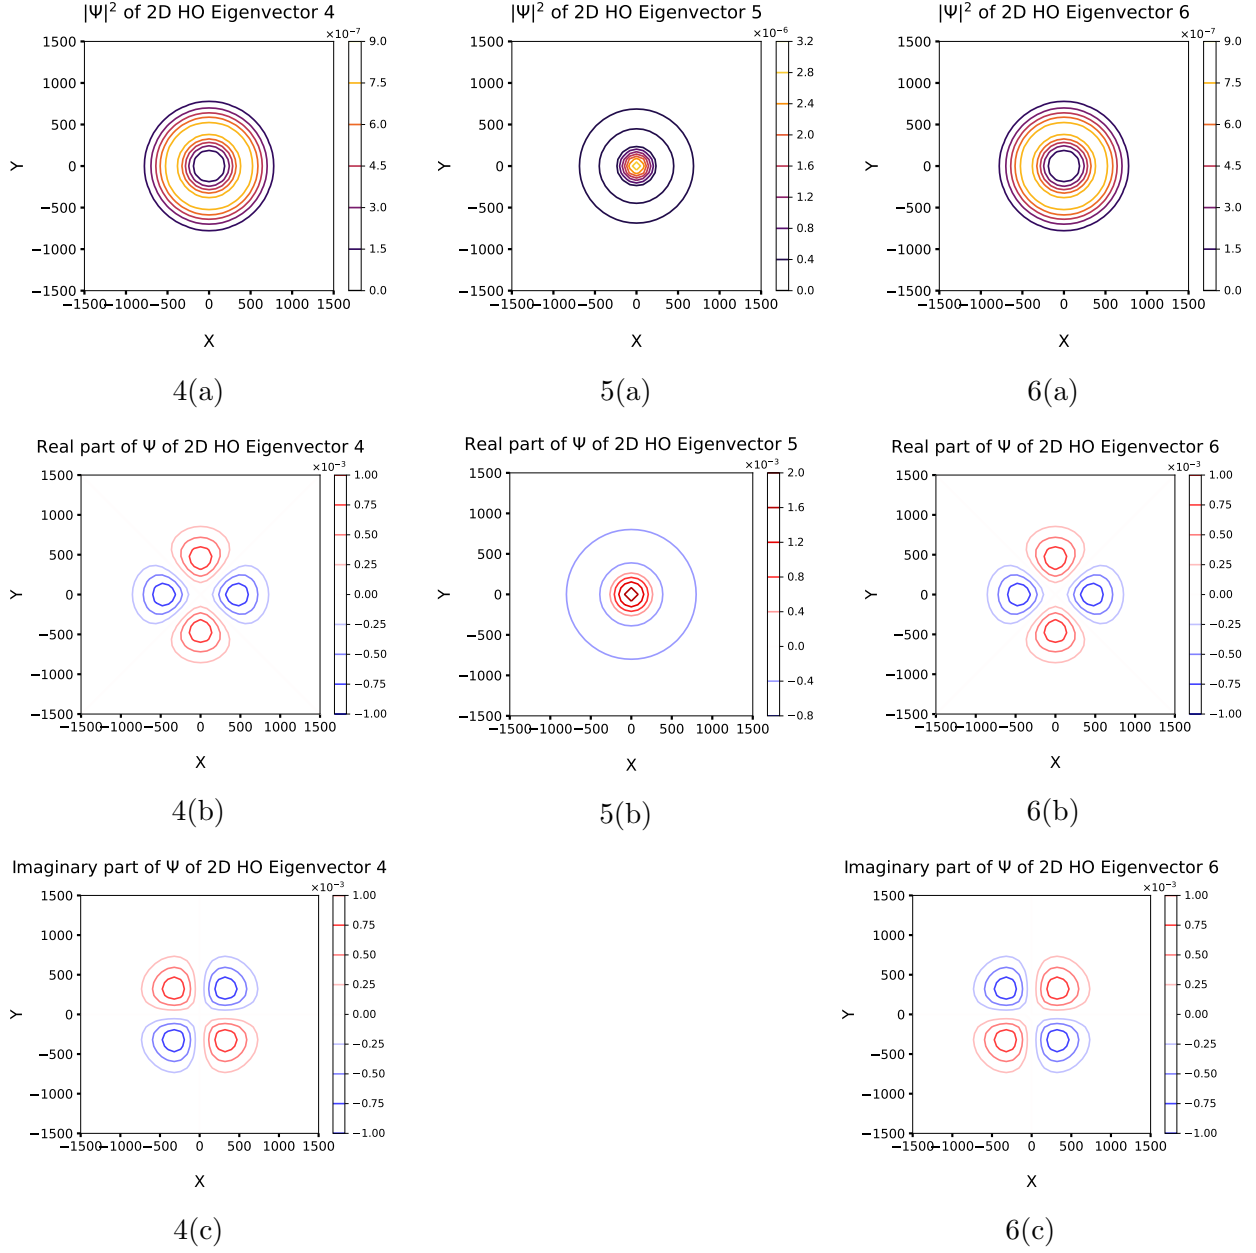

Figure 2: The (a) probability density, (b) real component and (c) phase of the analytical wavefunctions calculated using the ITEM at 65 grid points, in the absence of a uniform perpendicular magnetic field. The quantum numbers  $(n, M)$  of the eigenvectors are: 4.  $(0, -2)$ , 5.  $(1, 0)$ , 6.  $(0, -2)$

## 1.2 Numerical

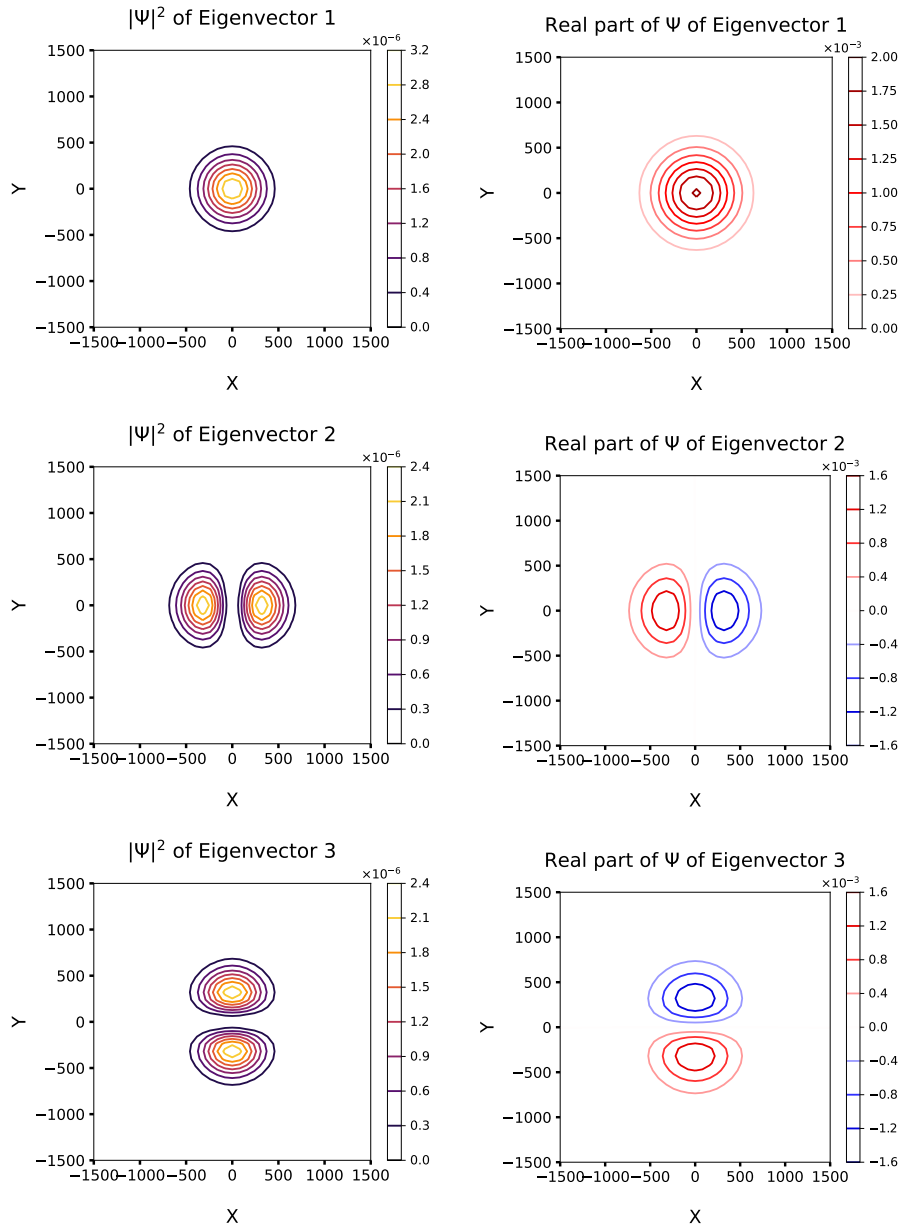

Figure 3: The probability density contour plots of the 1st, 2nd and 3rd numerically obtained eigenfunctions obtained using ITP for magnetic field strength  $B = 0$  T.

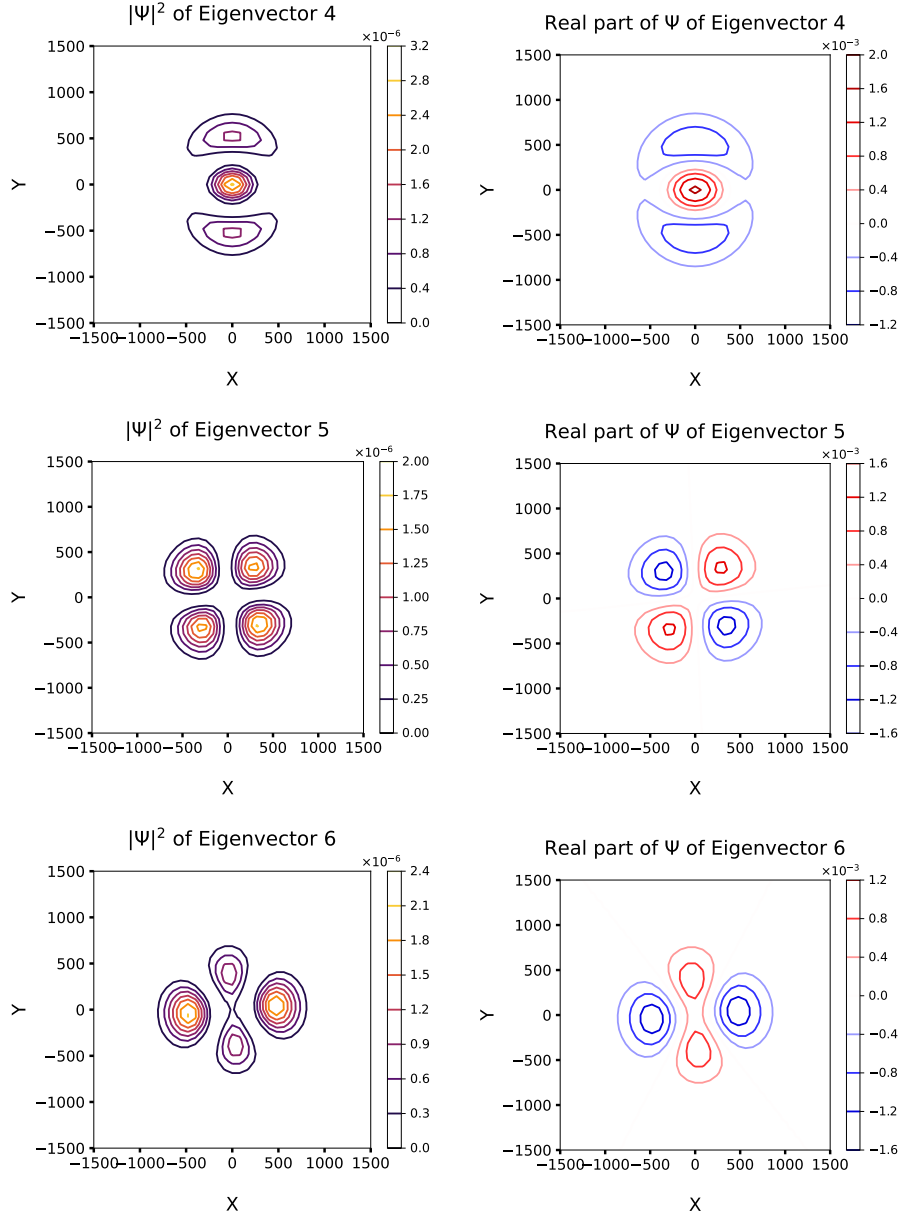

Figure 4: The probability density contour plots of the 4th, 5th and 6th numerically obtained eigenfunctions obtained using ITP for magnetic field strength  $B = 0$  T.

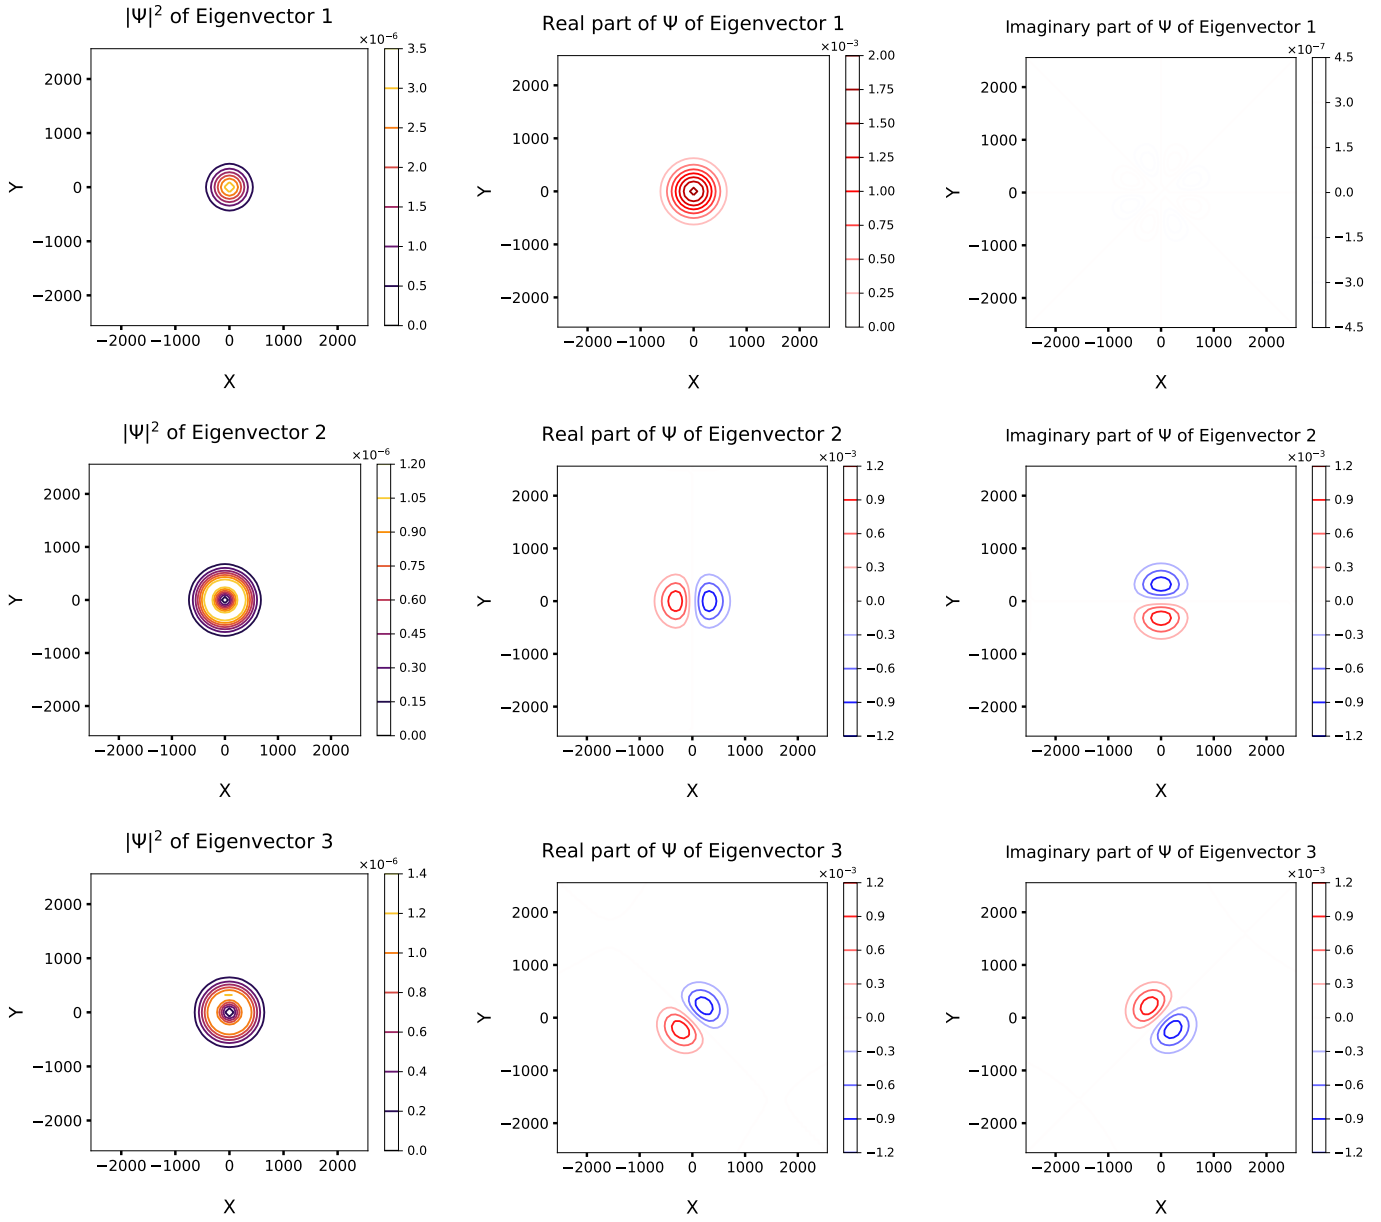

Figure 5: The probability density contour plots of the 1st, 2nd and 3rd numerically obtained eigenfunctions obtained using ITP for magnetic field strength  $B = 1$  T.

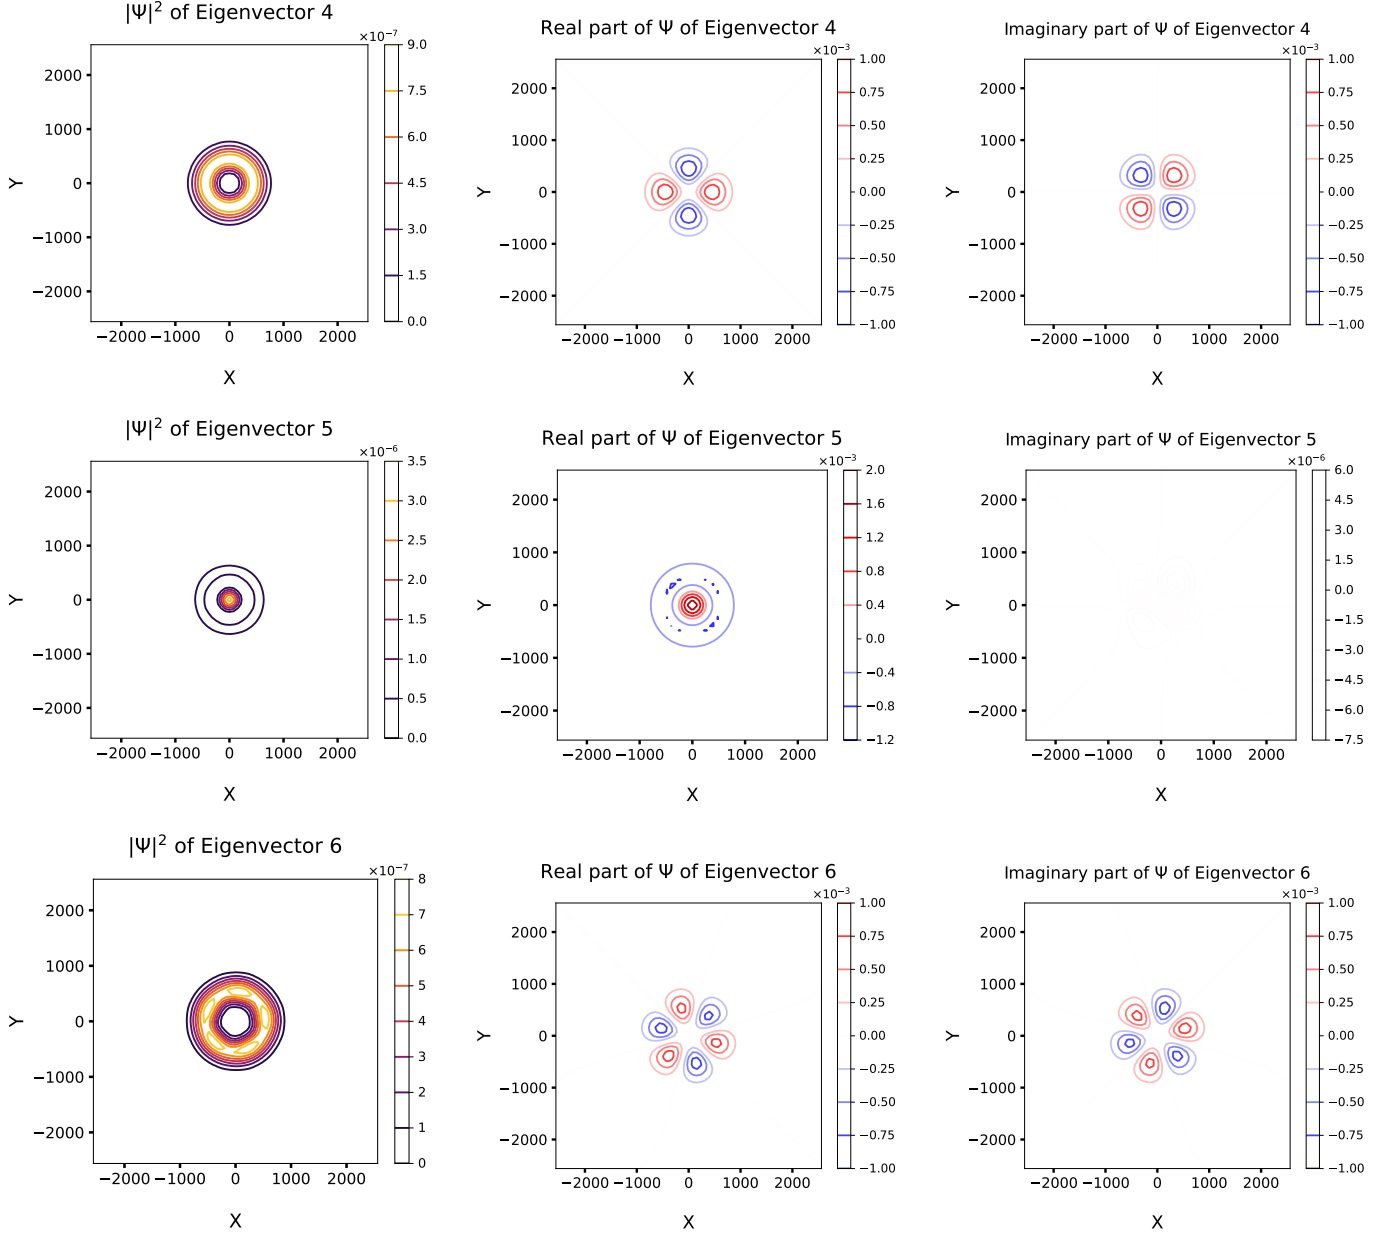

Figure 6: The probability density contour plots of the 4th, 5th and 6th numerically obtained eigenfunctions obtained using ITP for magnetic field strength  $B = 1$  T.

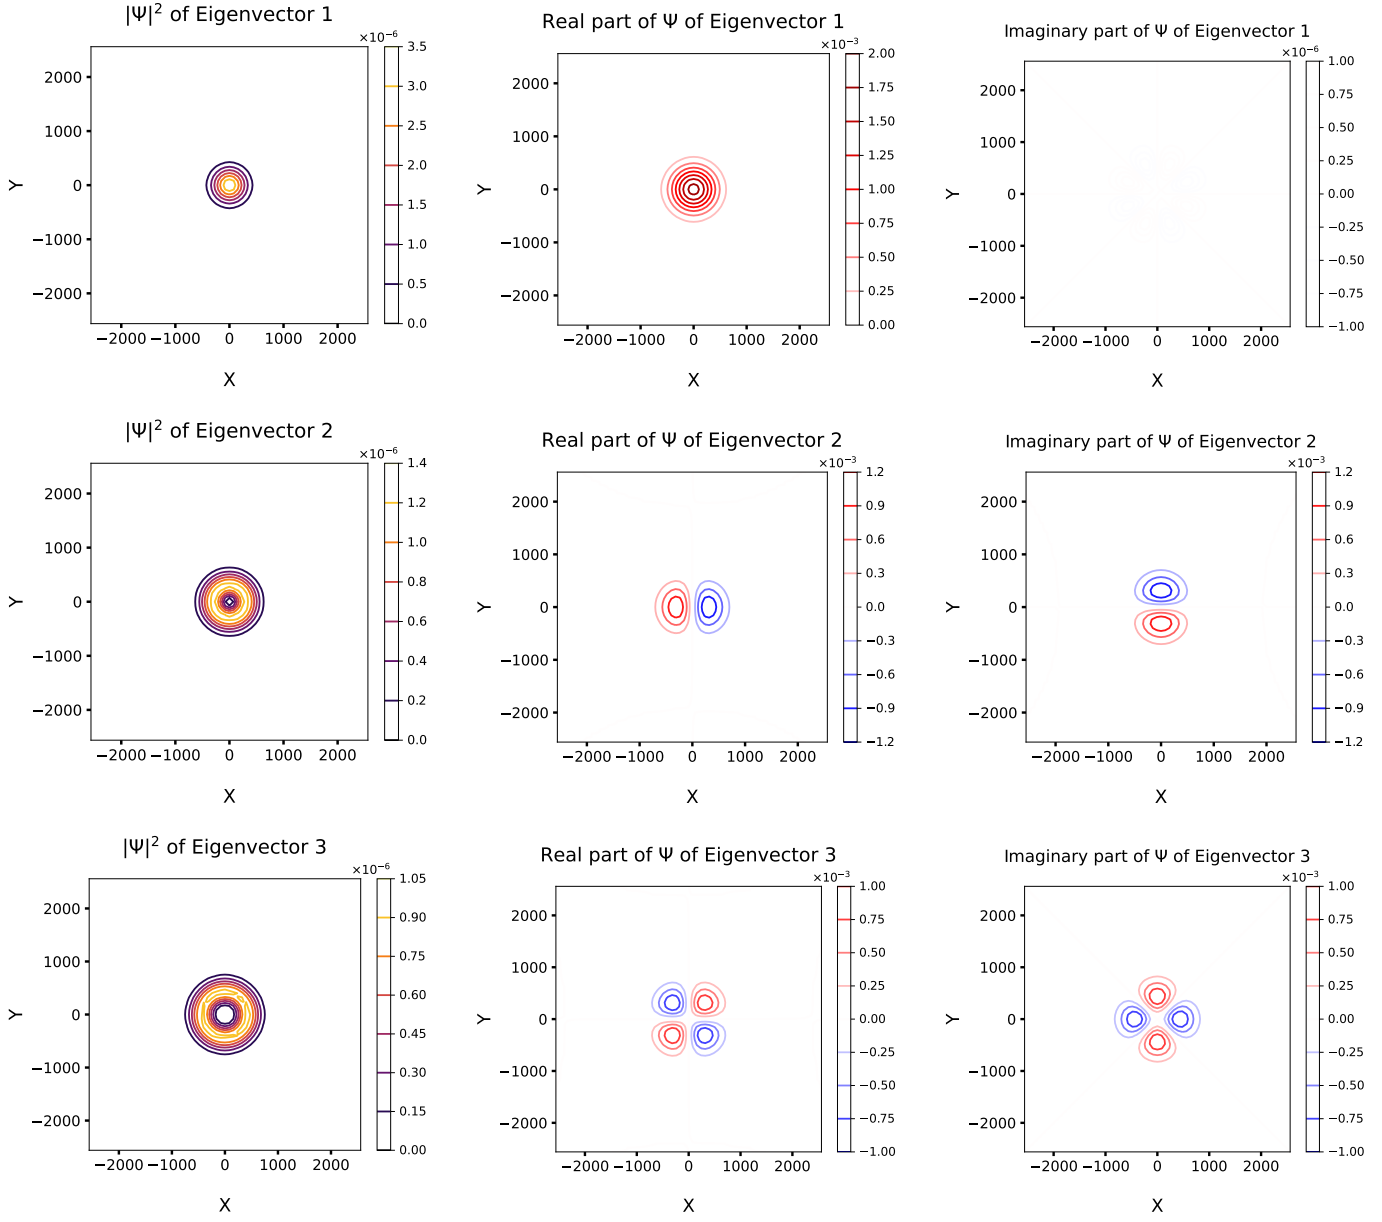

Figure 7: The probability density contour plots of the 1st, 2nd and 3rd numerically obtained eigenfunctions obtained using ITP for magnetic field strength  $B = 2$  T.

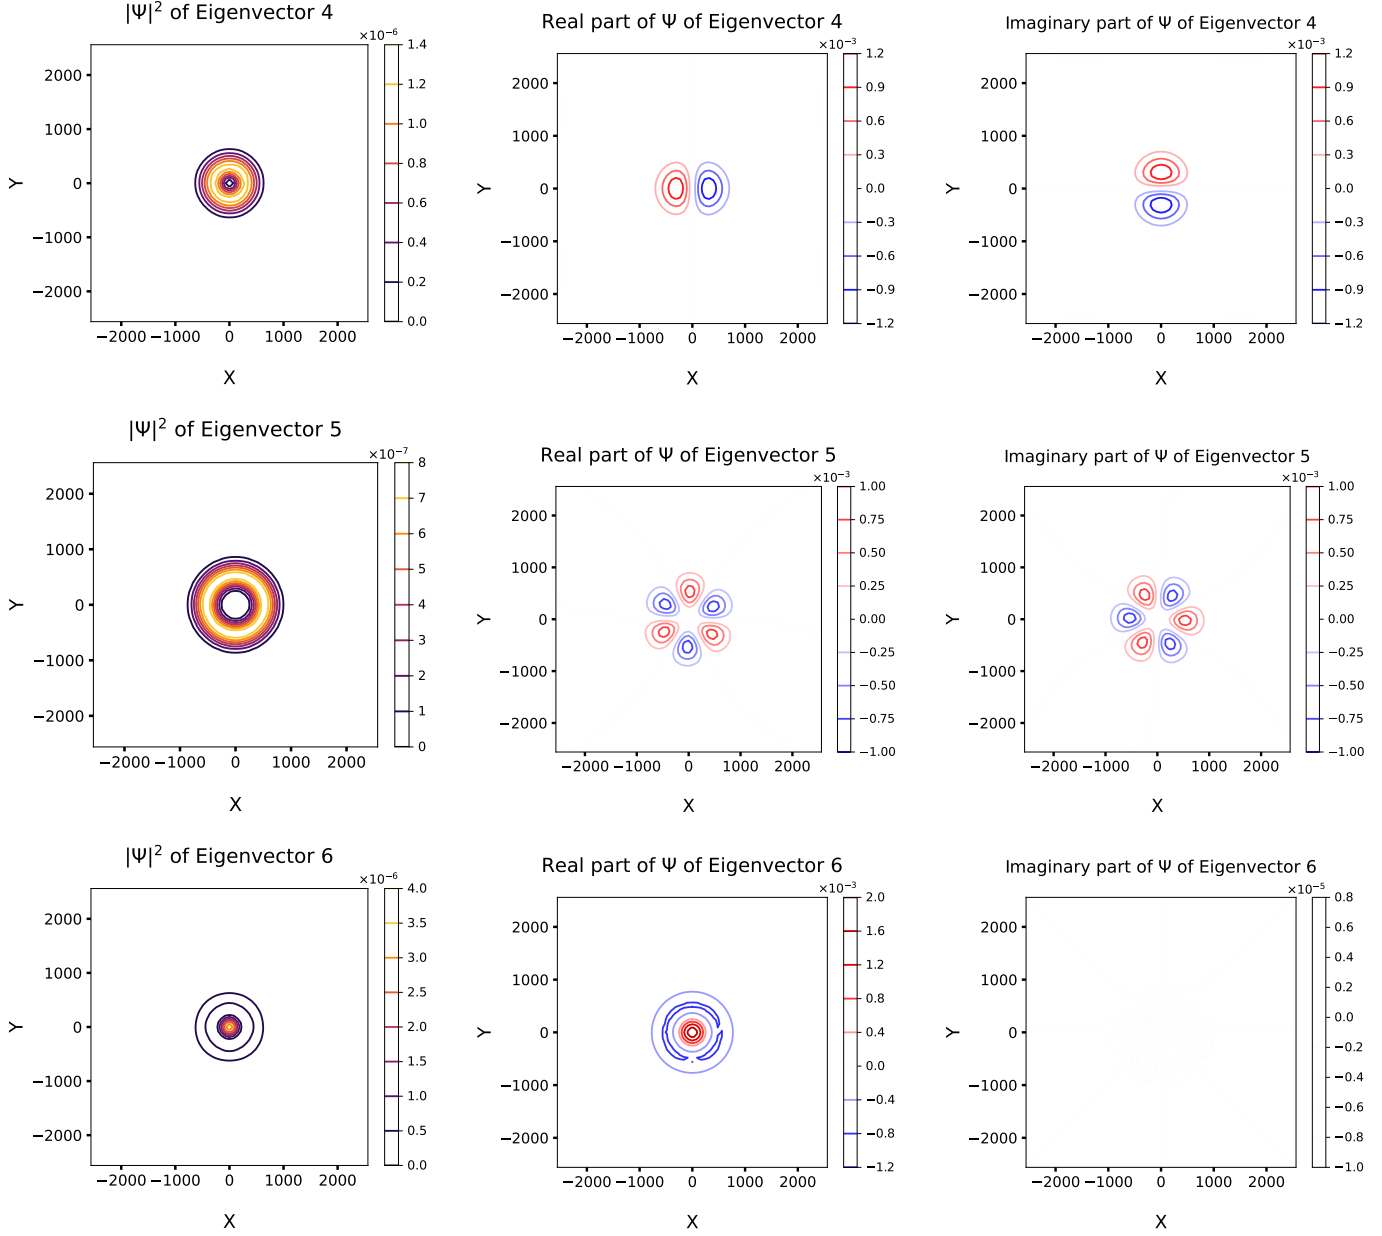

Figure 8: The probability density contour plots of the 4th, 5th and 6th numerically obtained eigenfunctions obtained using ITP for magnetic field strength  $B = 2$  T.

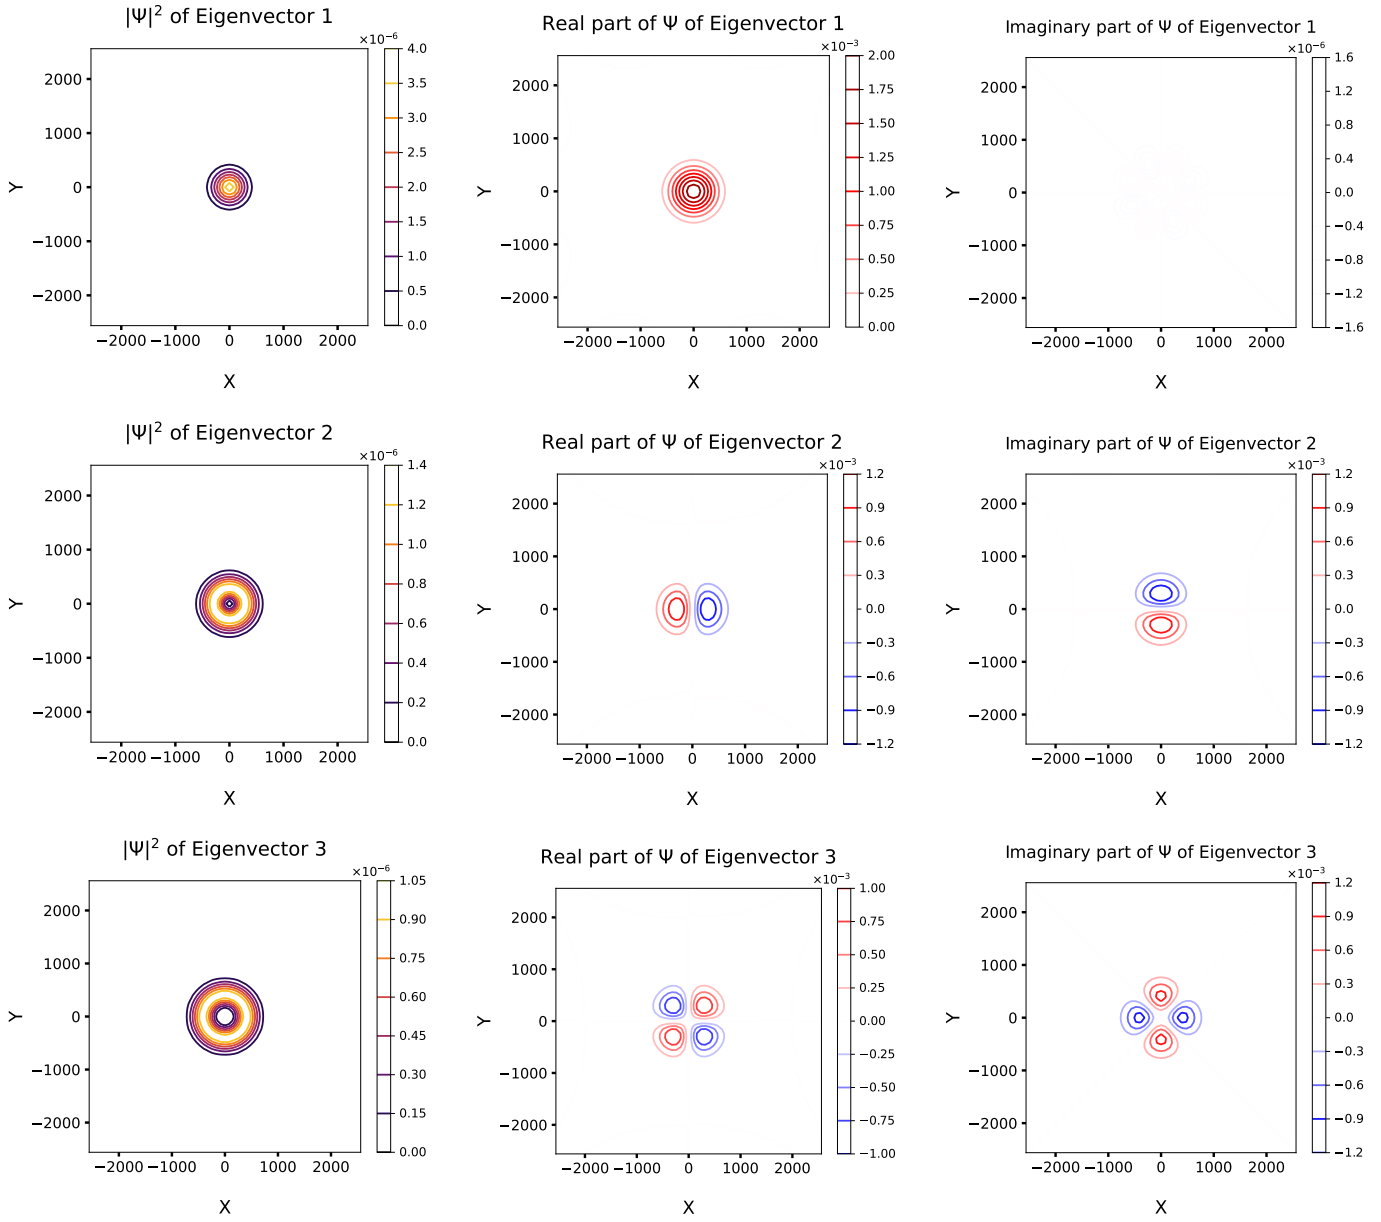

Figure 9: The probability density contour plots of the 1st, 2nd and 3rd numerically obtained eigenfunctions obtained using ITP for magnetic field strength  $B = 3$  T.

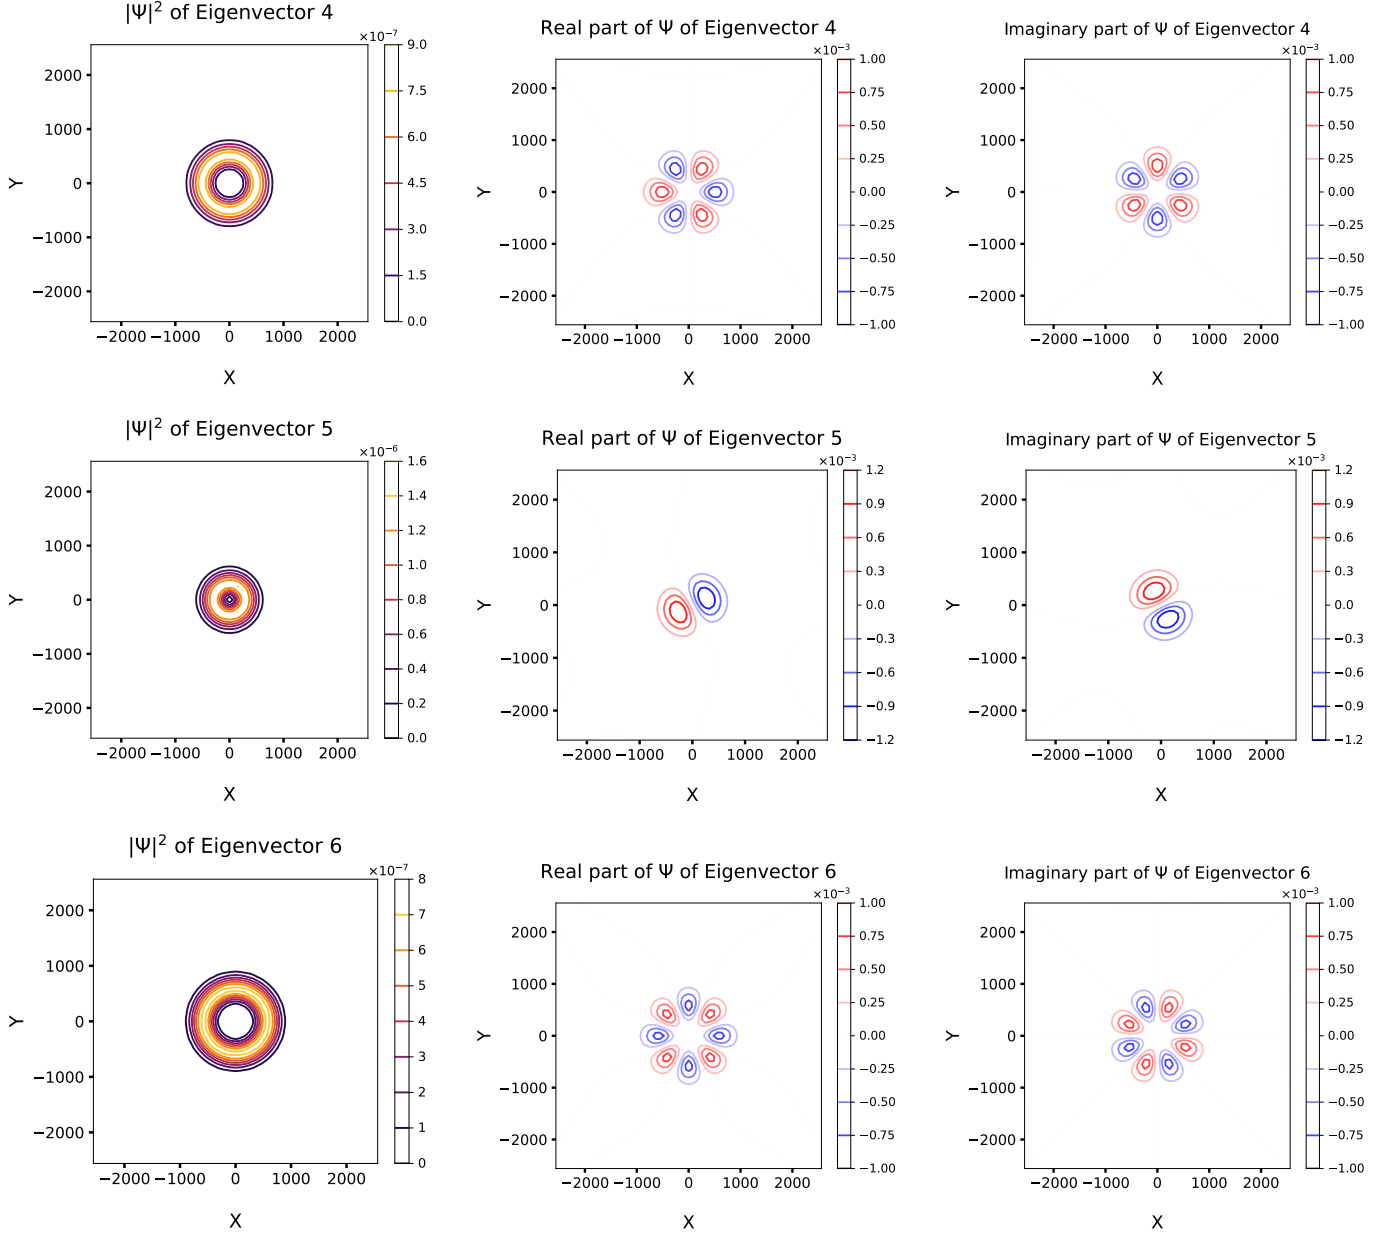

Figure 10: The probability density contour plots of the 4th, 5th and 6th numerically obtained eigenfunctions obtained using ITP for magnetic field strength  $B = 3$  T.

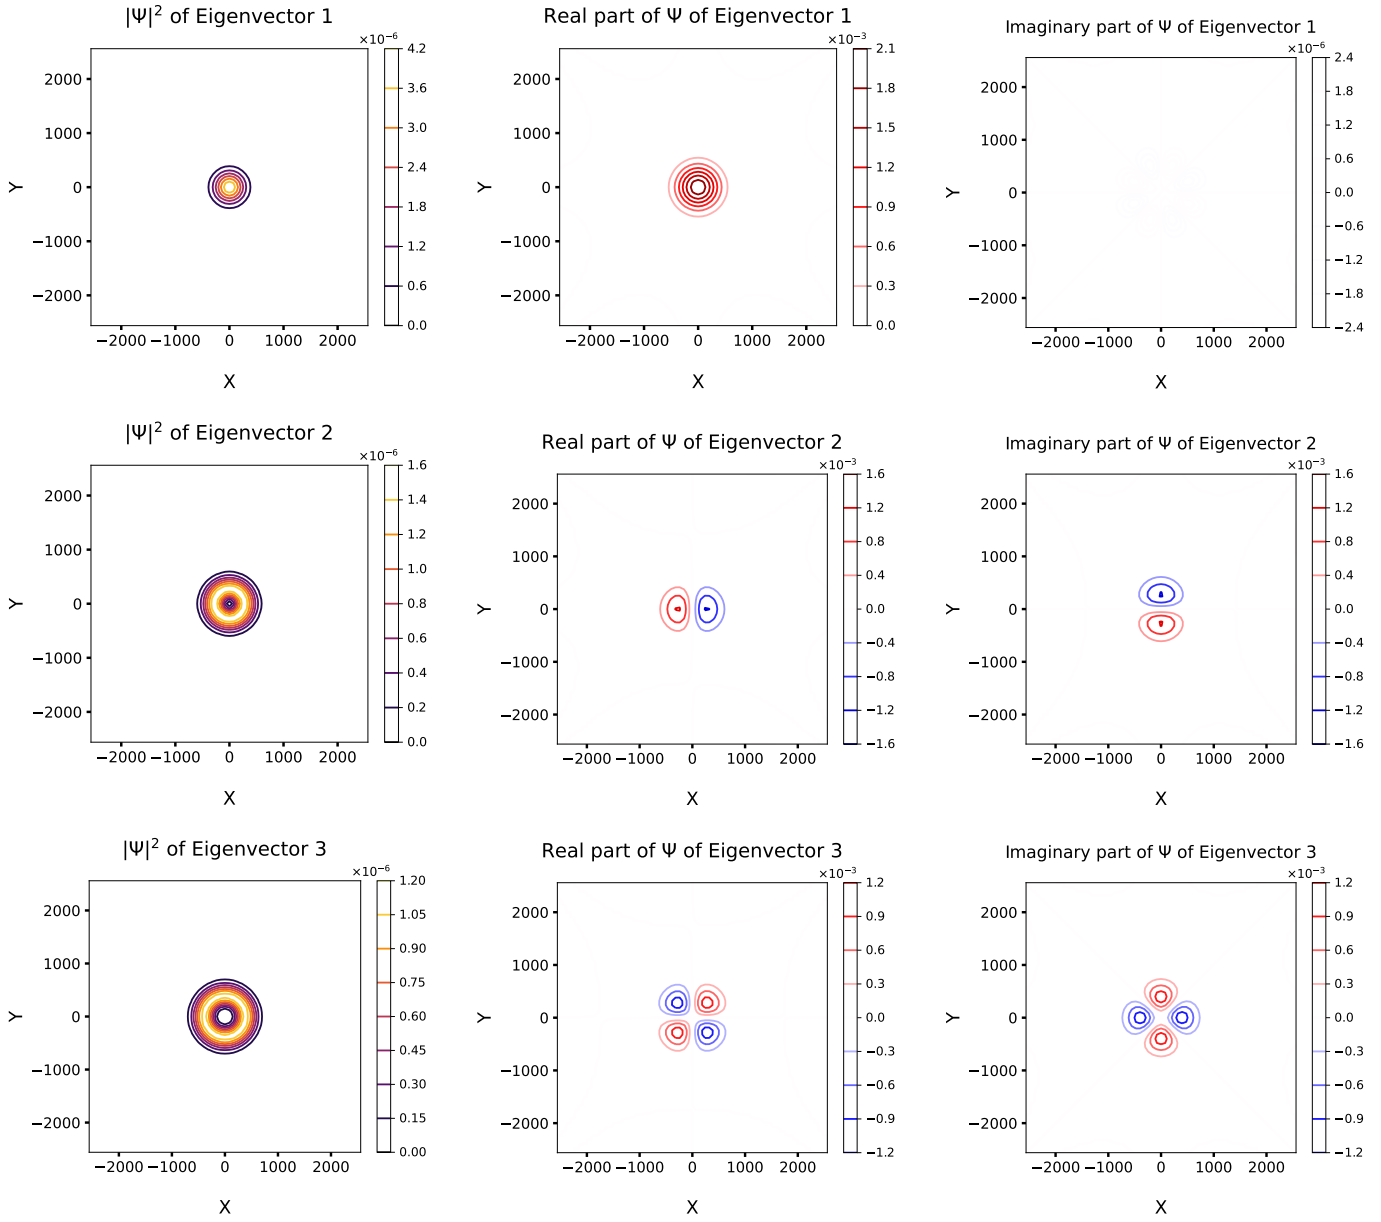

Figure 11: The probability density contour plots of the 1st, 2nd and 3rd numerically obtained eigenfunctions obtained using ITP for magnetic field strength  $B = 4$  T.

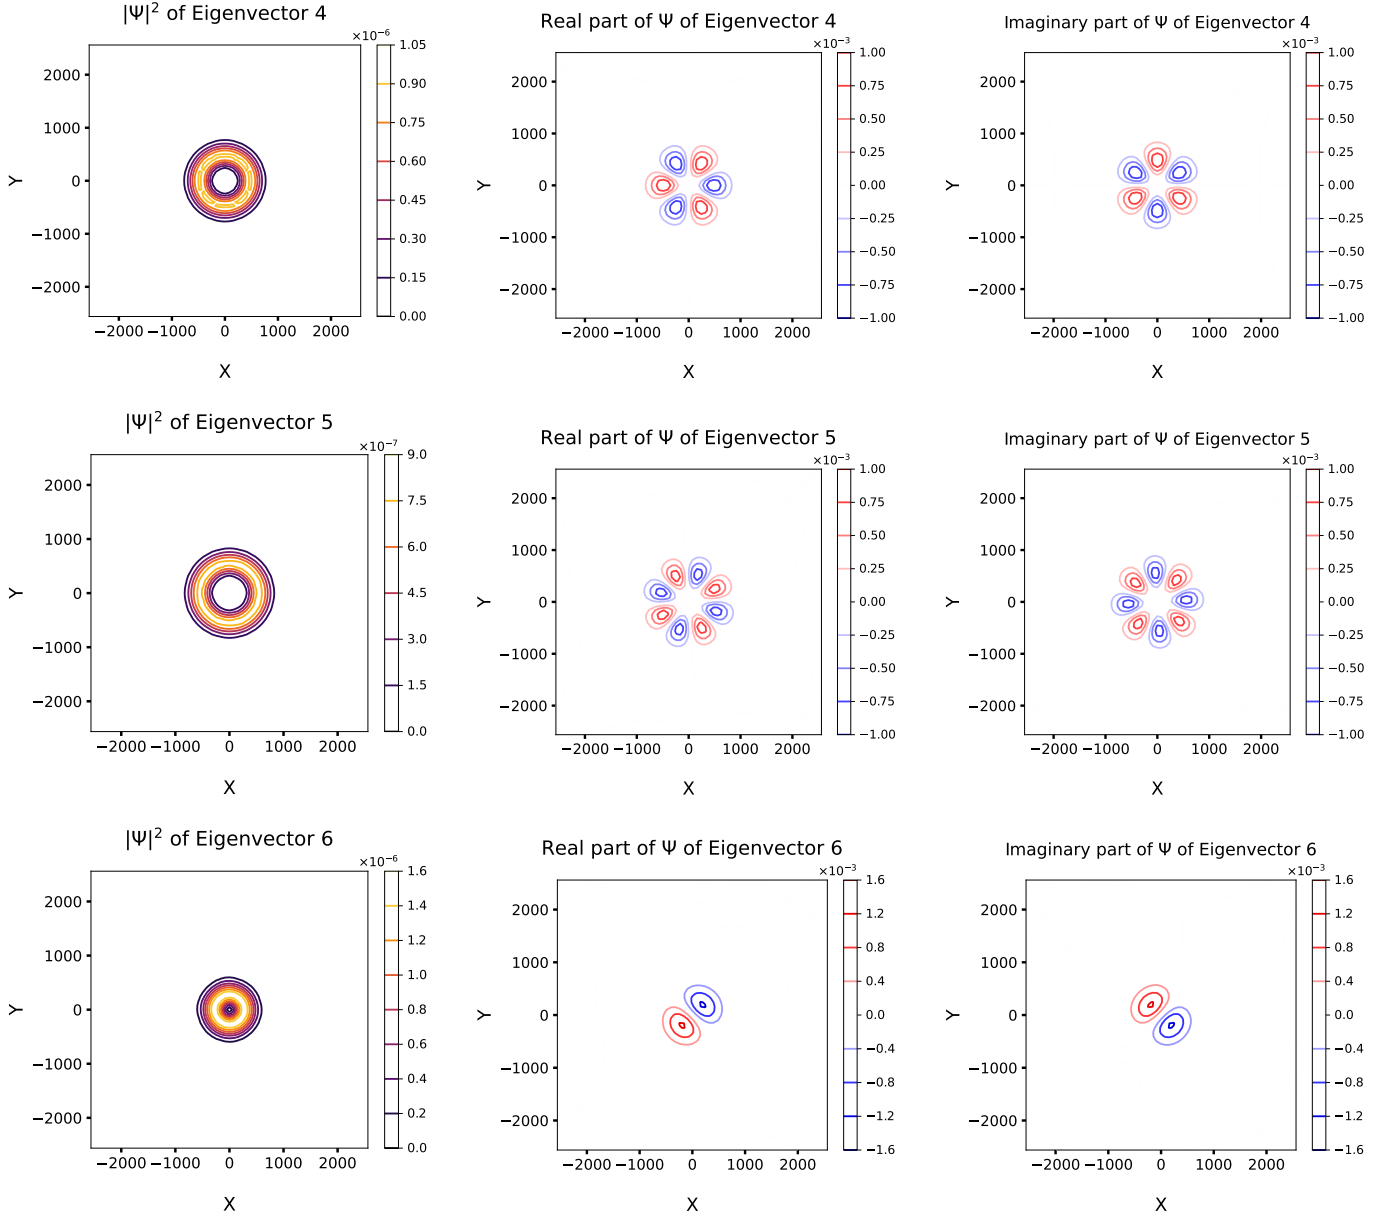

Figure 12: The probability density contour plots of the 4th, 5th and 6th numerically obtained eigenfunctions obtained using ITP for magnetic field strength  $B = 4$  T.

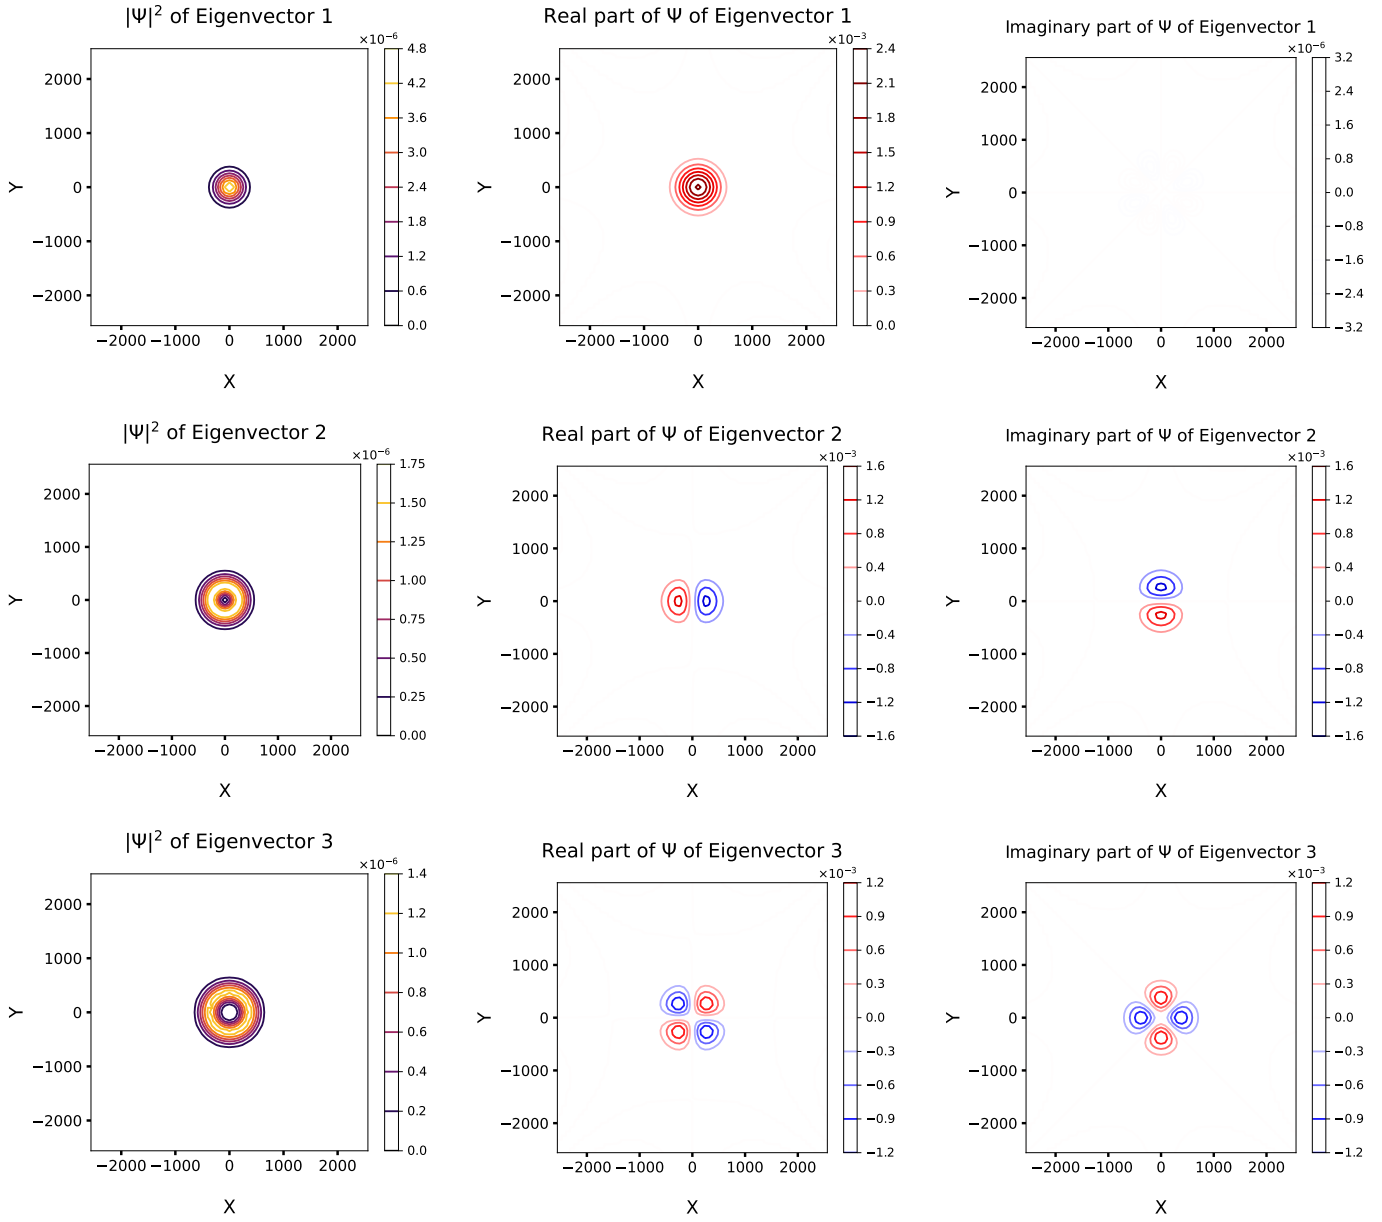

Figure 13: The probability density contour plots of the 1st, 2nd and 3rd numerically obtained eigenfunctions obtained using ITP for magnetic field strength  $B = 5$  T.

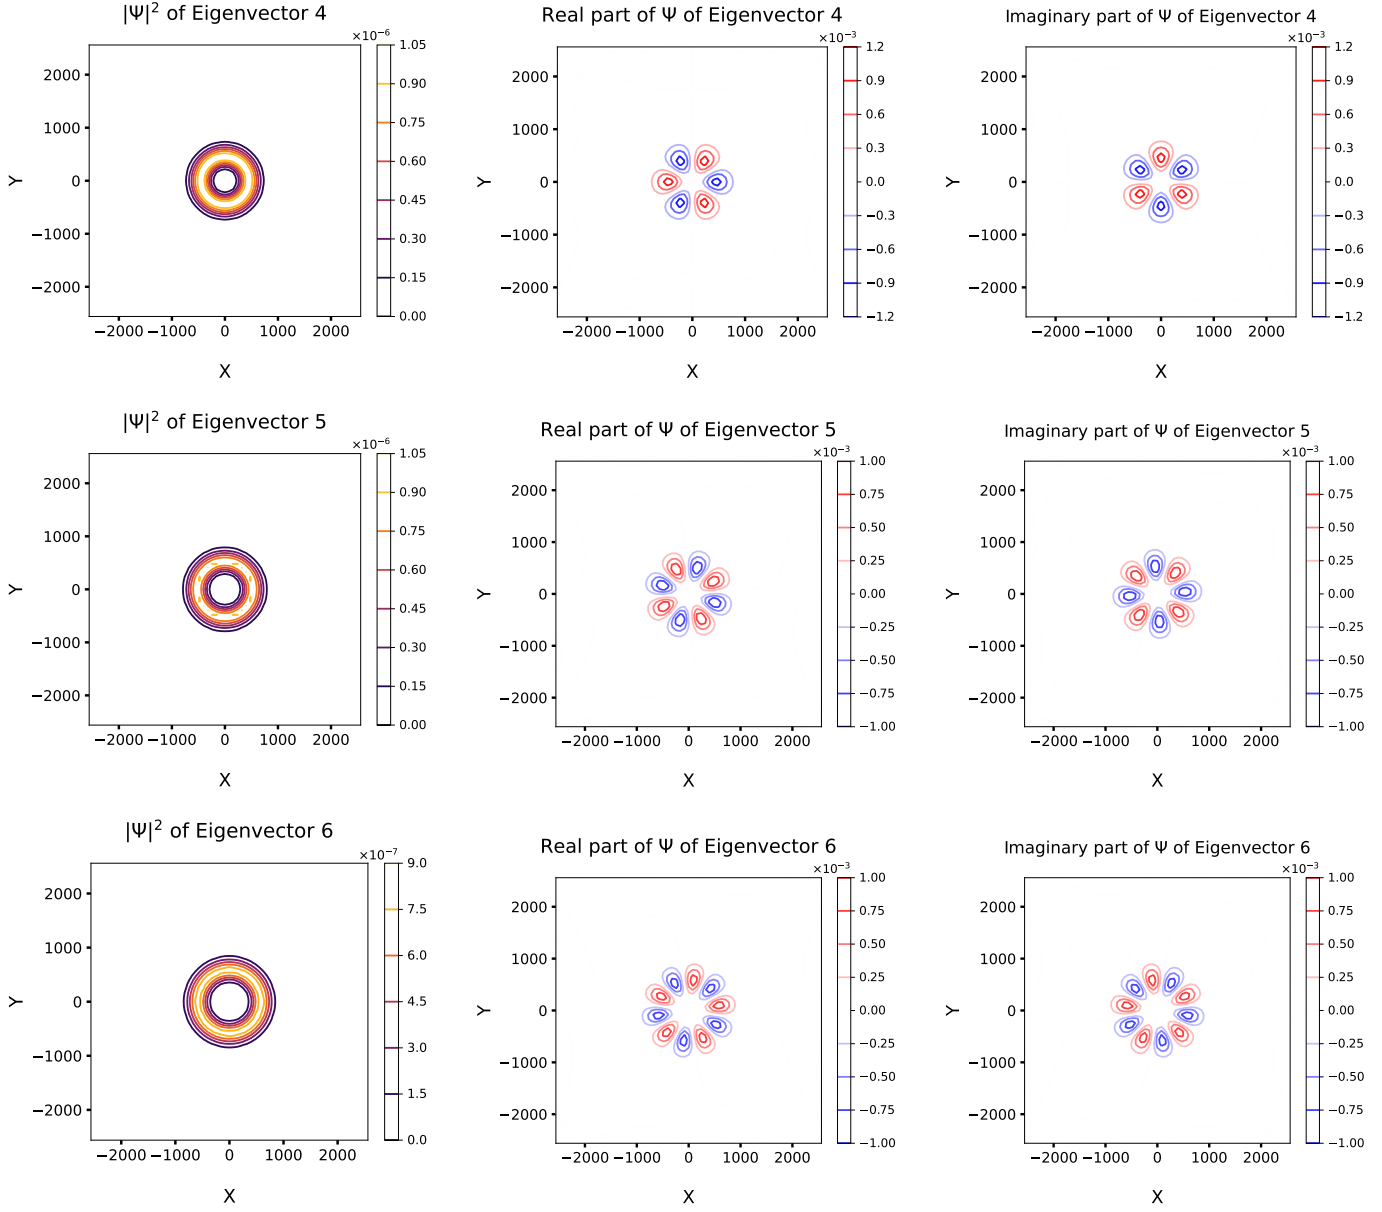

Figure 14: The probability density contour plots of the 4th, 5th and 6th numerically obtained eigenfunctions obtained using ITP for magnetic field strength  $B = 5$  T.

## 2 Wavefunctions of the Gaussian system

We show the probability density, real and imaginary parts of the the numerically obtained (on a 121.7 nm x 121.7 nm, with 65 x 65 grid points) wavefunctions using the ITP for the system of a single electron ( $q = -e$ ) in GaAs ( $m = 0.067m_e$ ) in a Gaussian system with parameters  $\alpha = 0.043 \text{ nm}^{-1}$  and  $V_0 = 9.5 \text{ meV}$ , varying magnetic field strength (B (T) = 0, 1, 2, ..., 10):

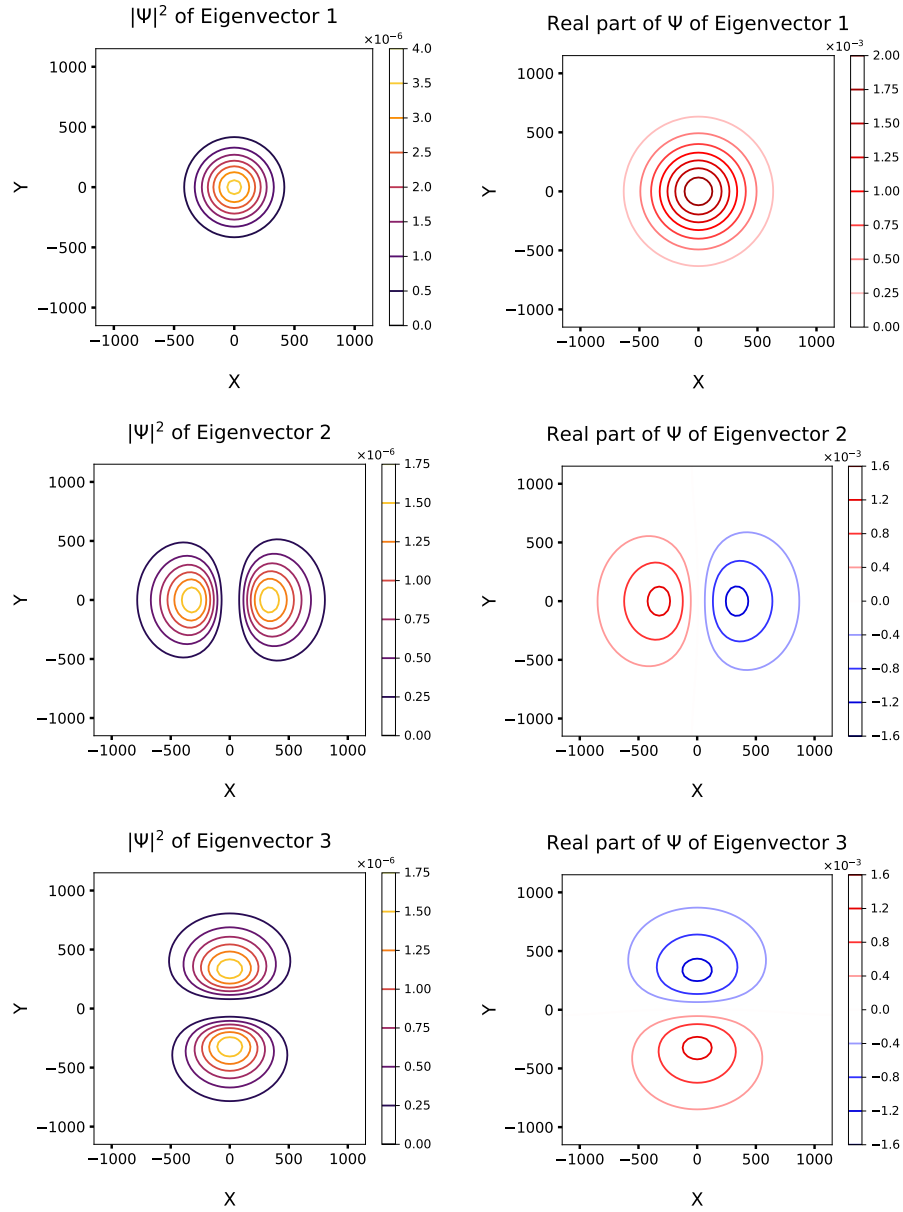

Figure 15: The probability density contour plots of the 1st, 2nd and 3rd numerically obtained eigenfunctions obtained using ITP for magnetic field strength  $B = 0$  T.

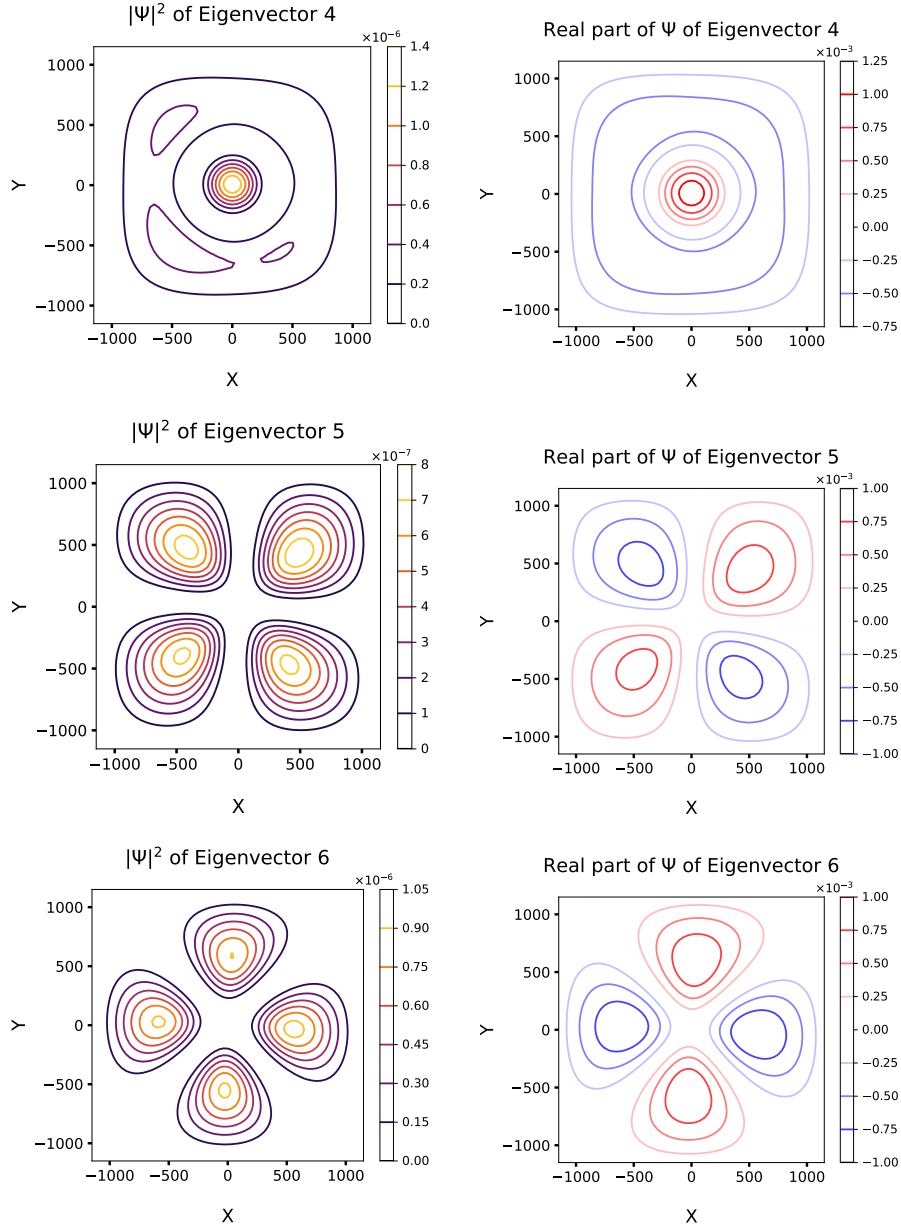

Figure 16: The probability density contour plots of the 4th, 5th and 6th numerically obtained eigenfunctions obtained using ITP for magnetic field strength  $B = 0$  T.

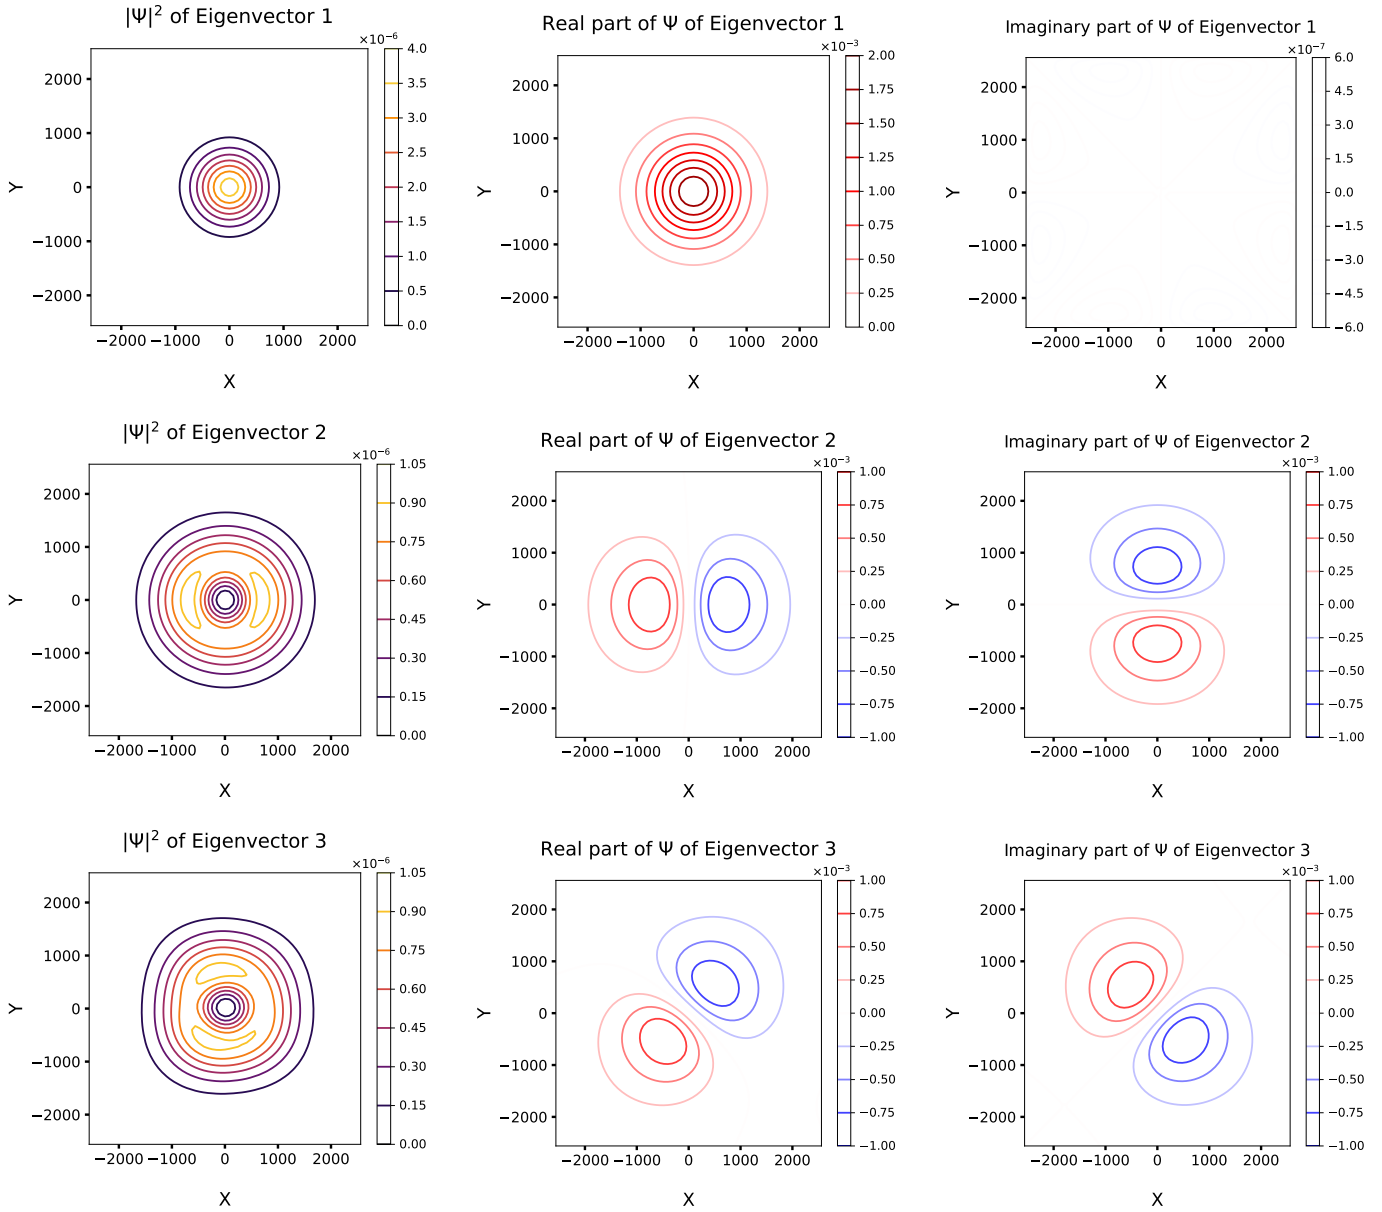

Figure 17: The probability density, real and imaginary contour plots of the 1st, 2nd and 3rd numerically obtained eigenfunctions obtained using ITP for magnetic field strength  $B = 1$  T.

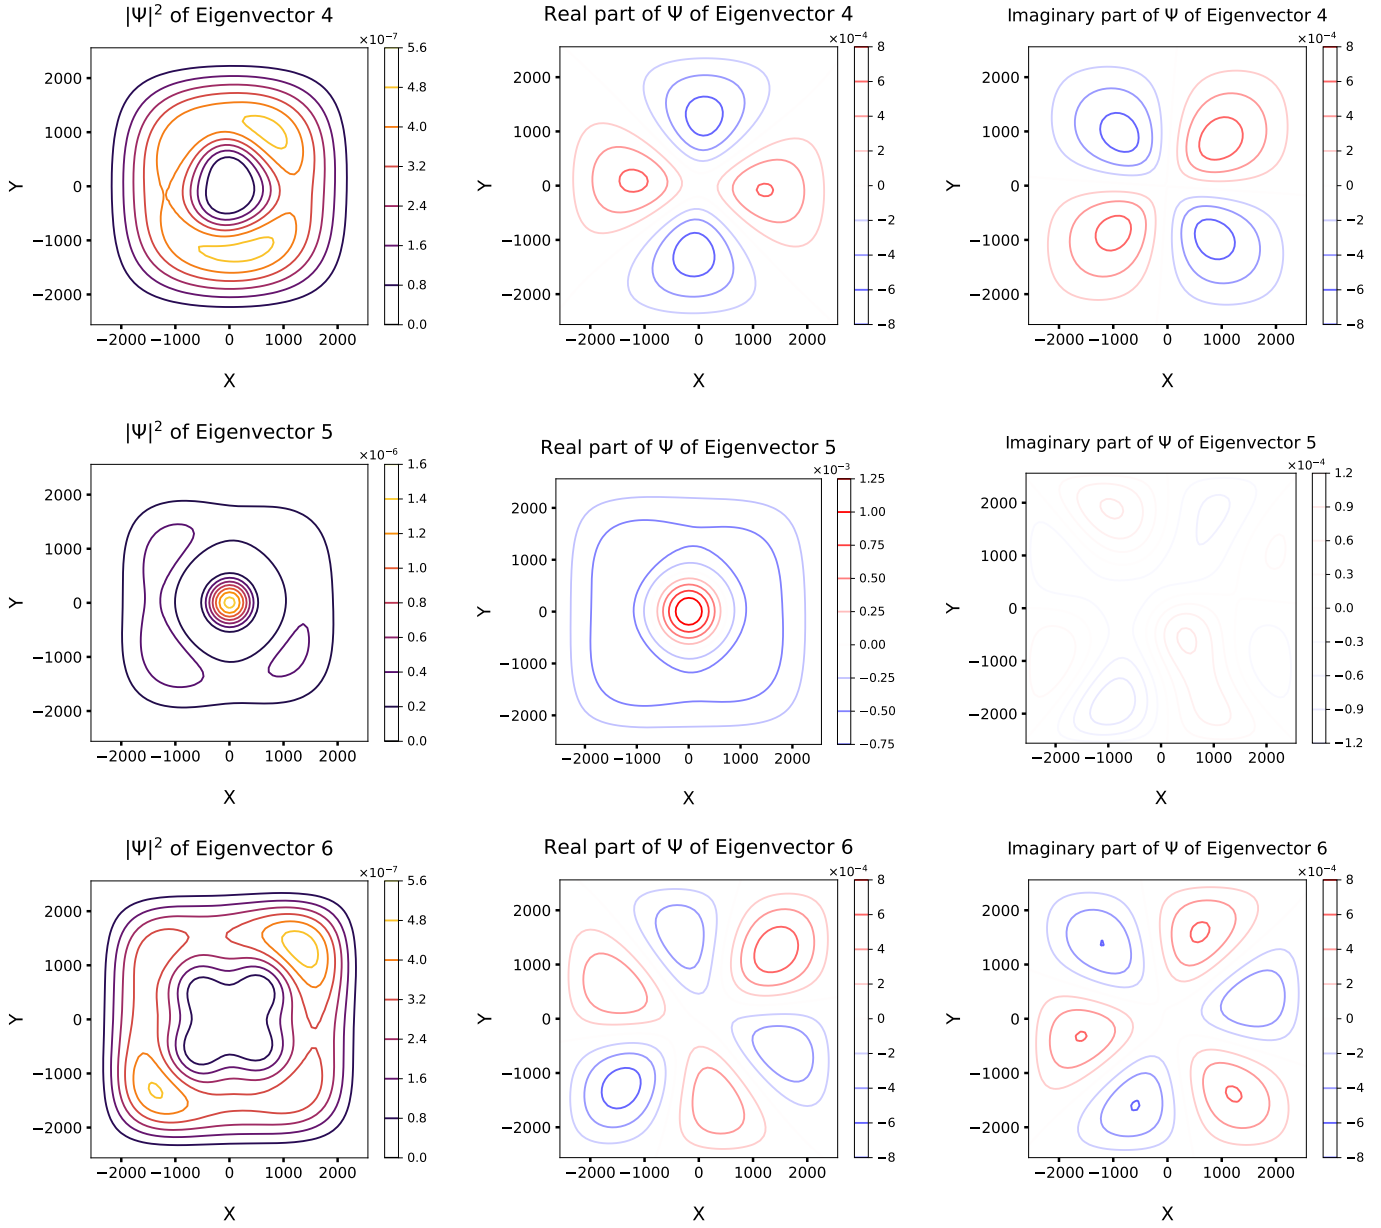

Figure 18: The probability density, real and imaginary contour plots of the 4th, 5th and 6th numerically obtained eigenfunctions obtained using ITP for magnetic field strength  $B = 1$  T.

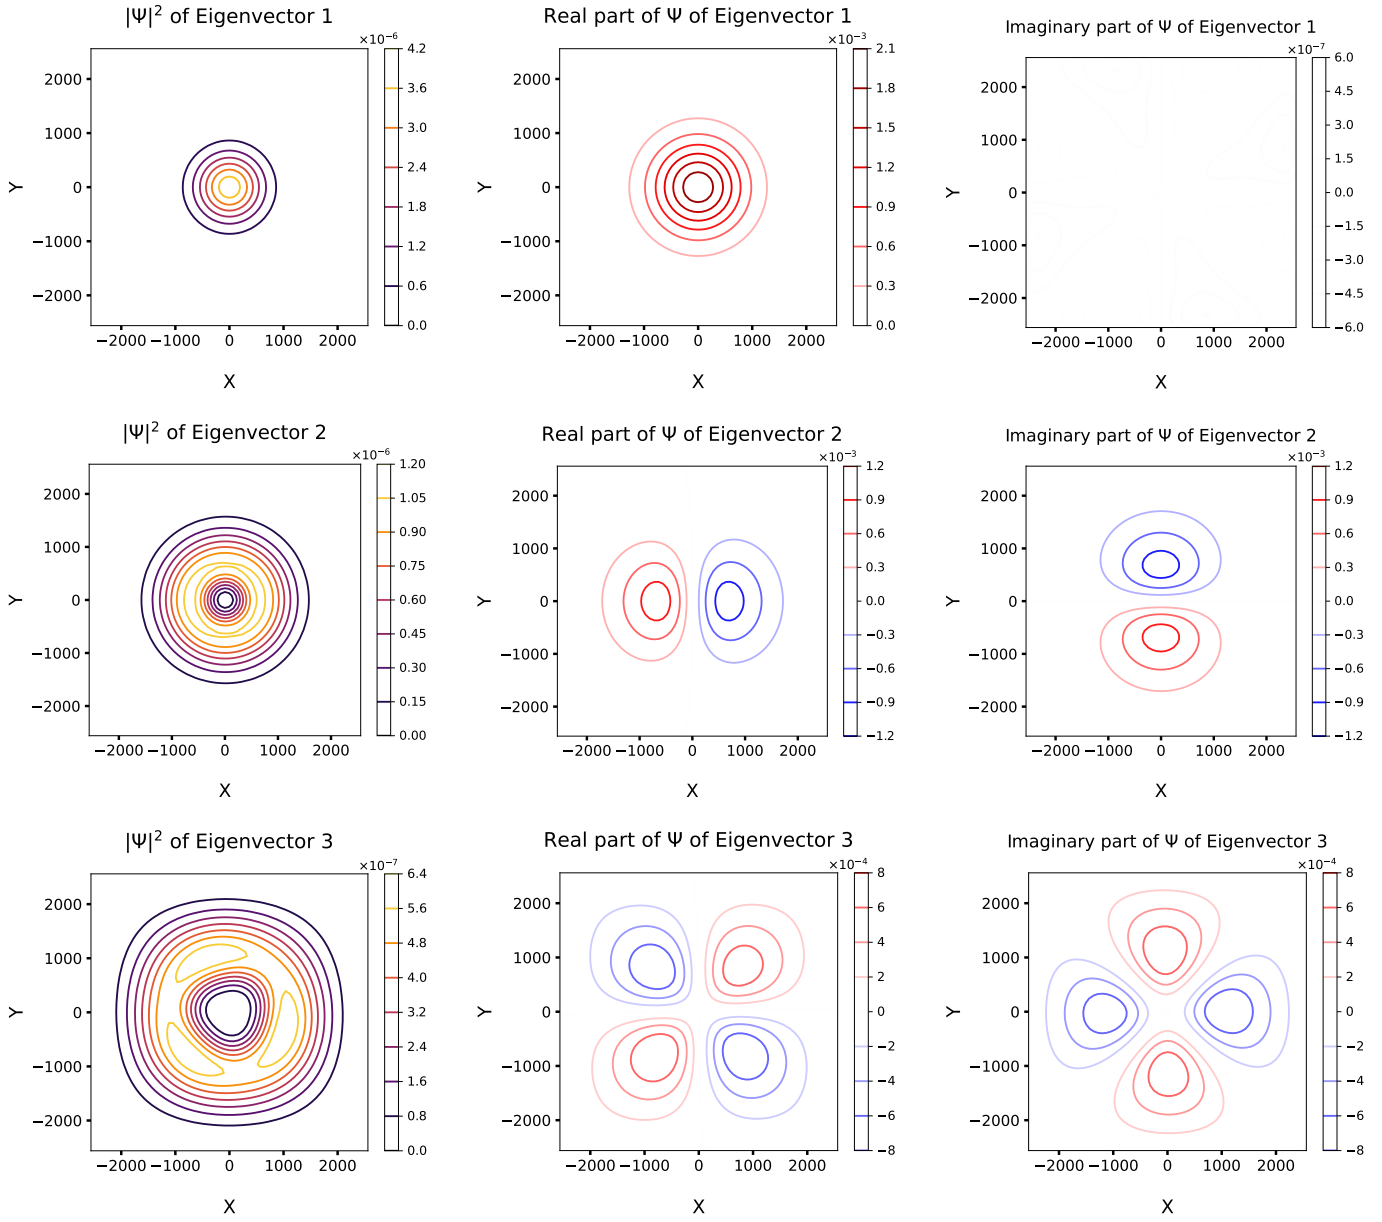

Figure 19: The probability density, real and imaginary contour plots of the 1st, 2nd and 3rd numerically obtained eigenfunctions obtained using ITP for magnetic field strength  $B = 2$  T.

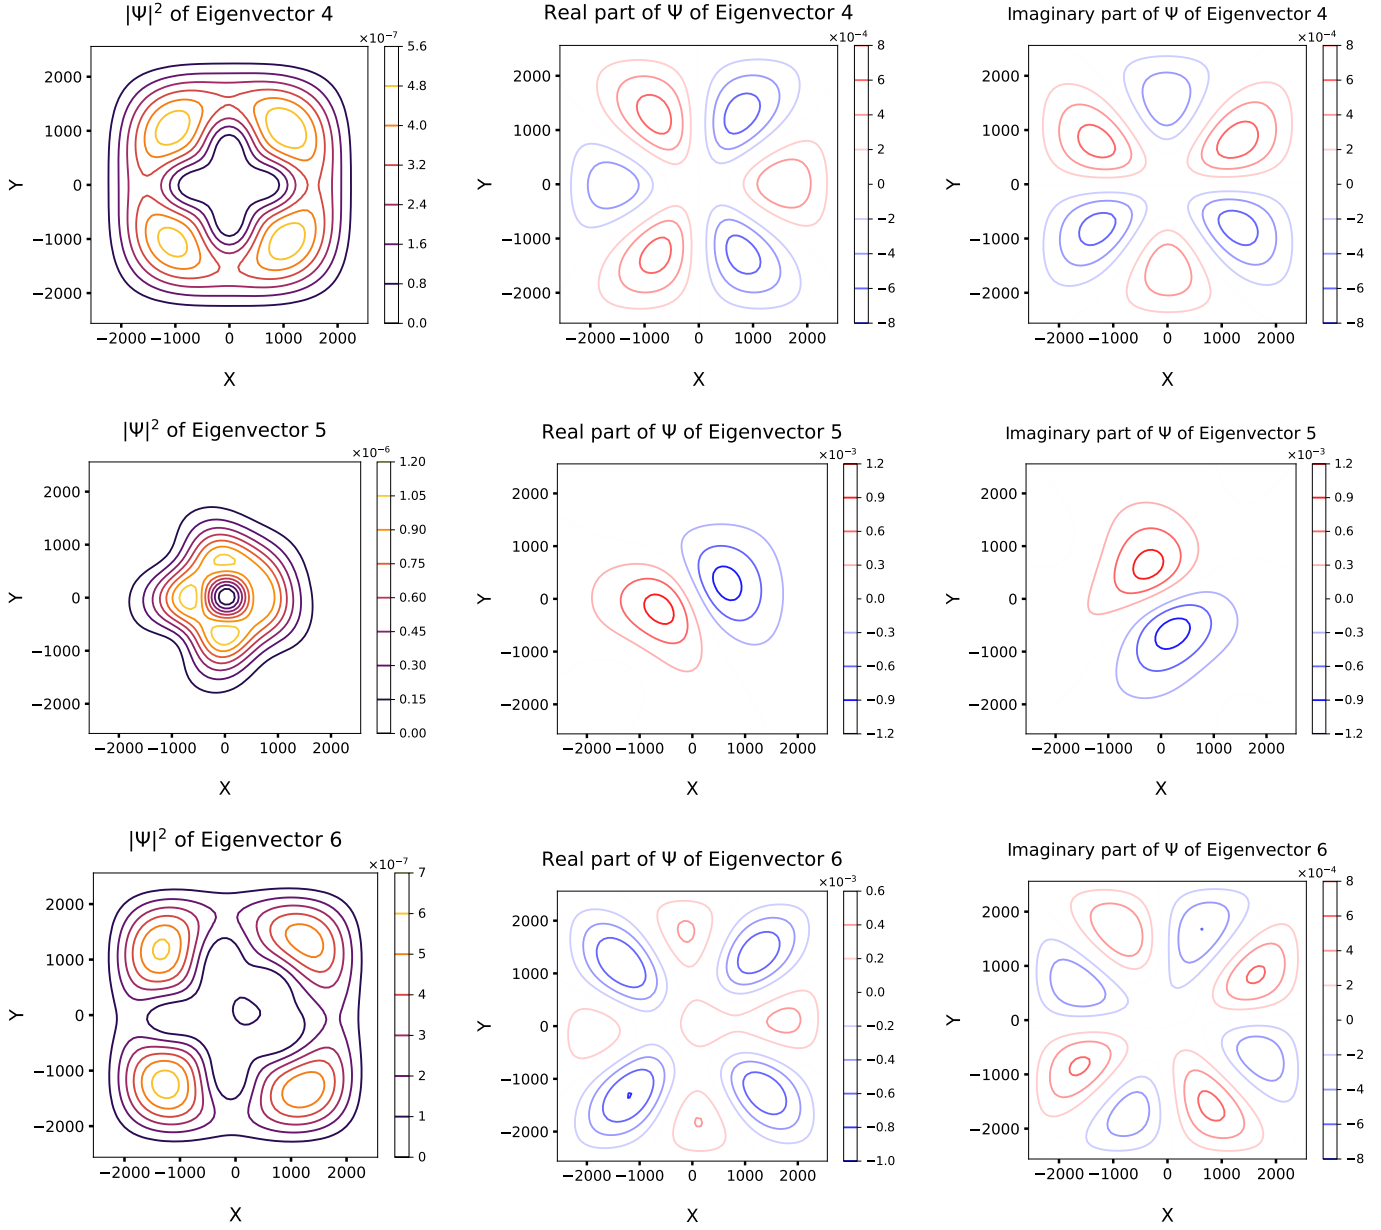

Figure 20: The probability density, real and imaginary contour plots of the 4th, 5th and 6th numerically obtained eigenfunctions obtained using ITP for magnetic field strength  $B = 2$  T.

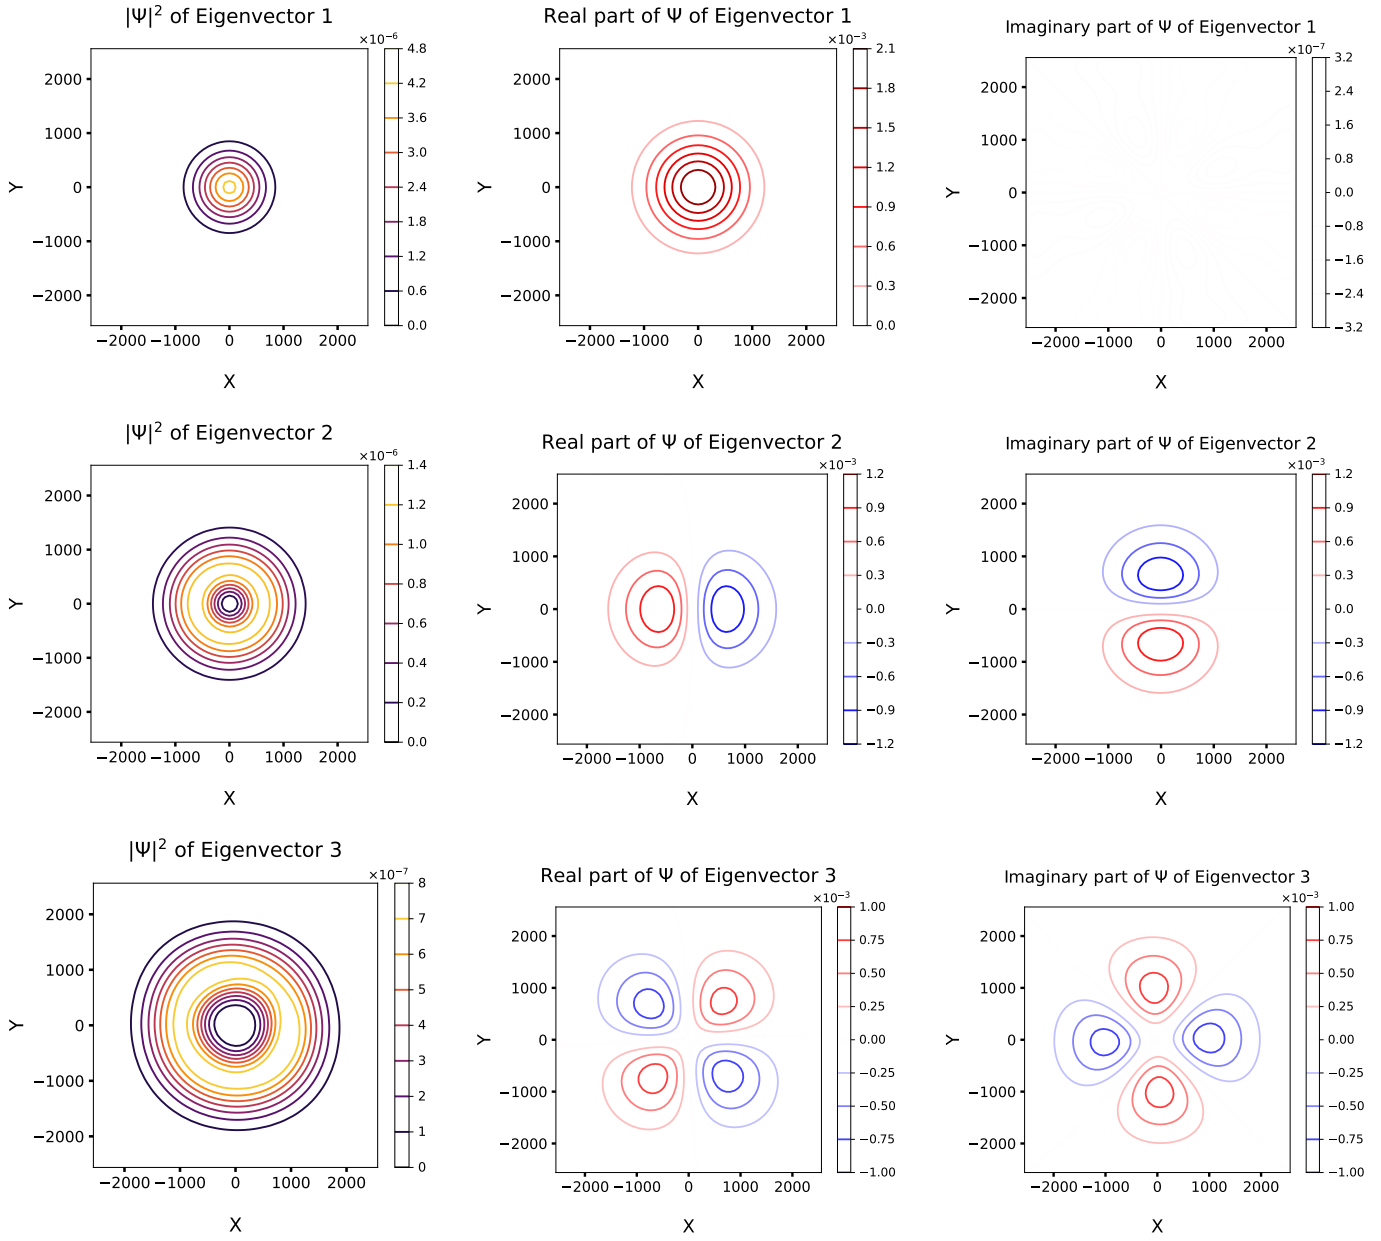

Figure 21: The probability density, real and imaginary contour plots of the 1st, 2nd and 3rd numerically obtained eigenfunctions obtained using ITP for magnetic field strength  $B = 3$  T.

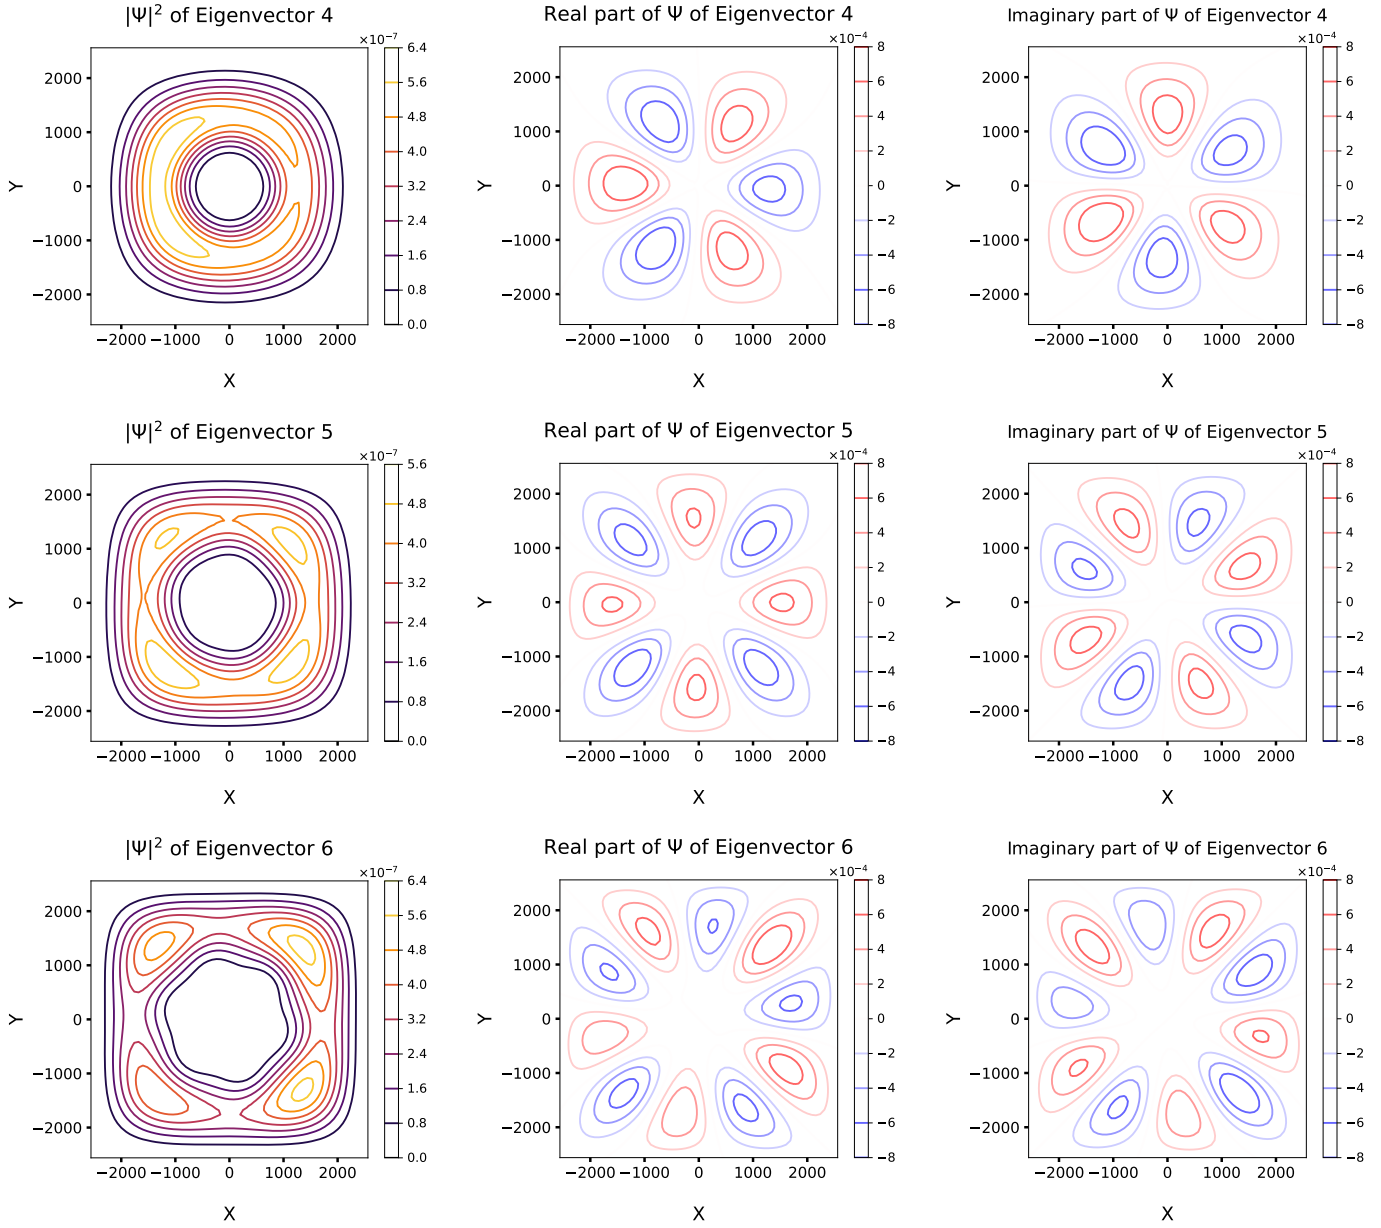

Figure 22: The probability density, real and imaginary contour plots of the 4th, 5th and 6th numerically obtained eigenfunctions obtained using ITP for magnetic field strength  $B = 3$  T.

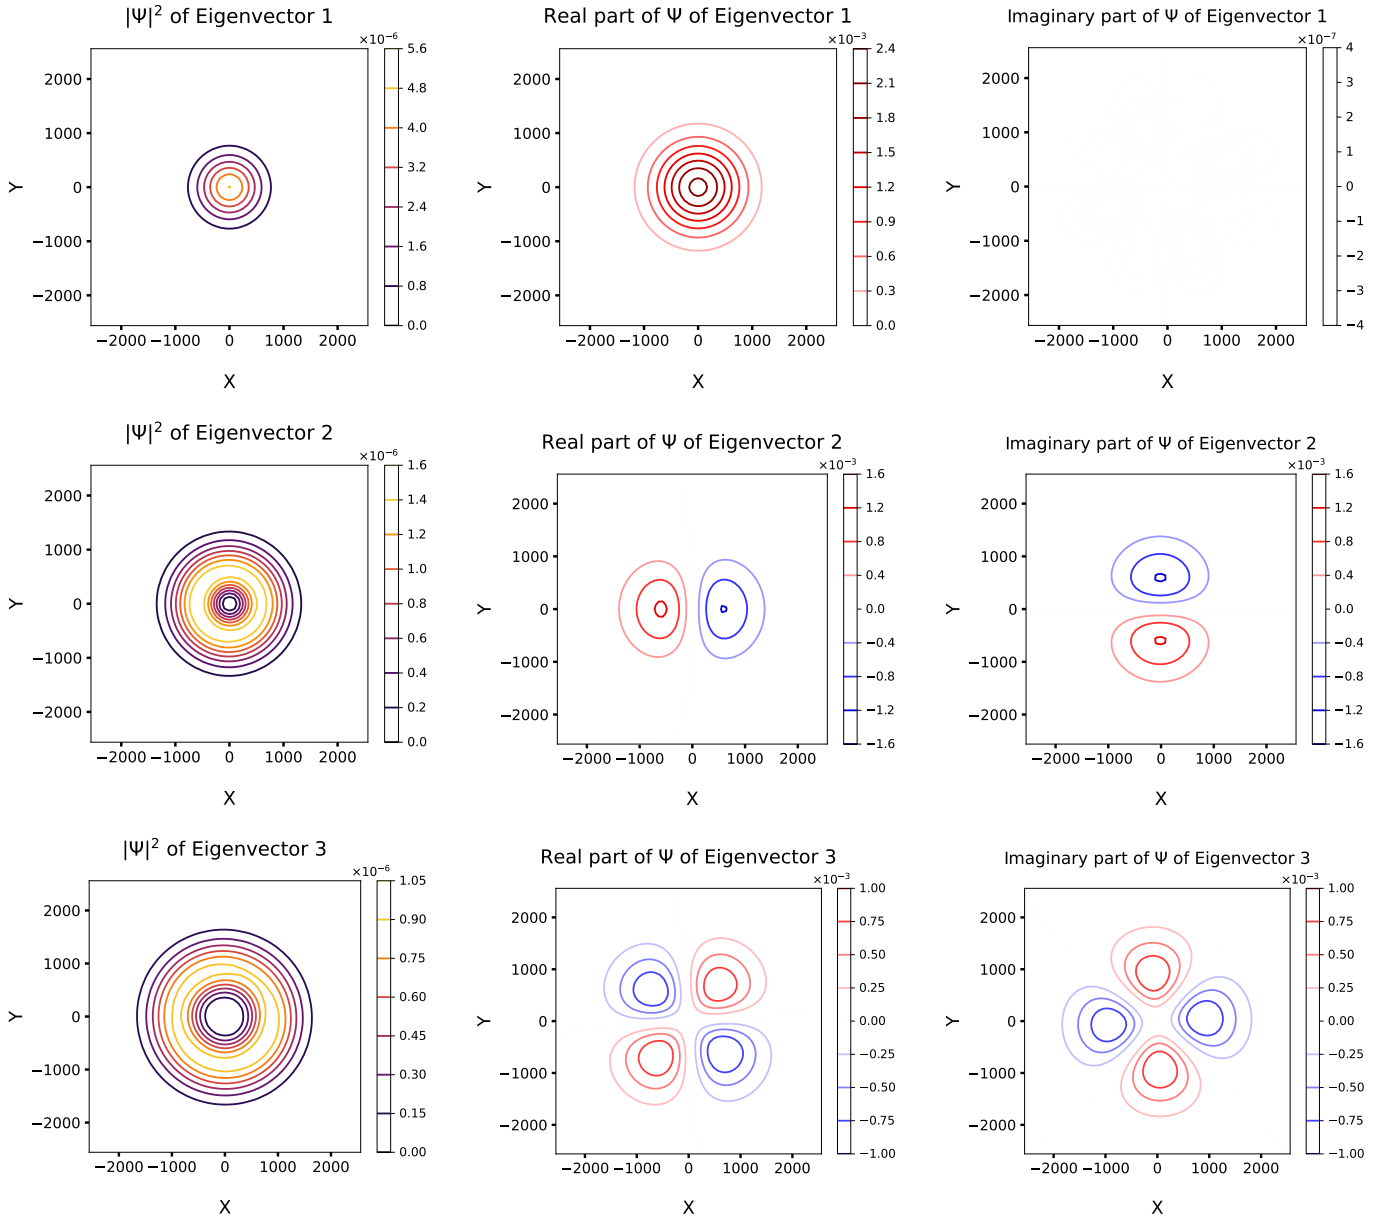

Figure 23: The probability density, real and imaginary contour plots of the 1st, 2nd and 3rd numerically obtained eigenfunctions obtained using ITP for magnetic field strength  $B = 4$  T.

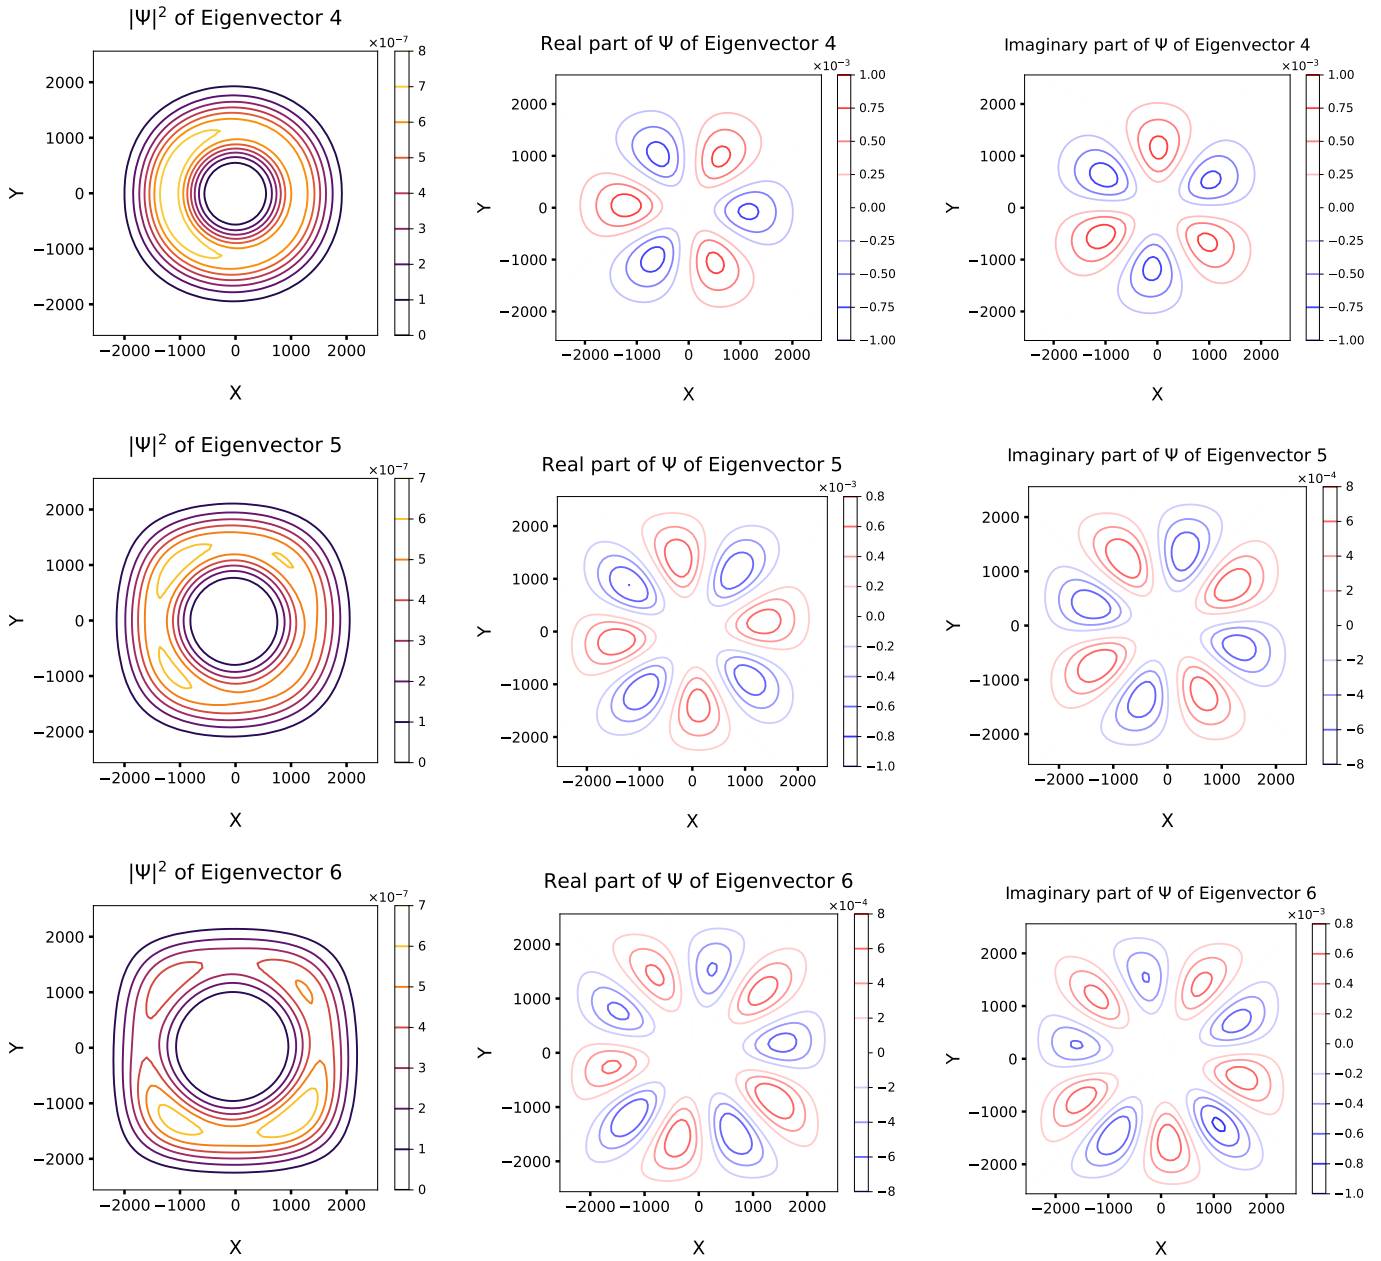

Figure 24: The probability density, real and imaginary contour plots of the 4th, 5th and 6th numerically obtained eigenfunctions obtained using ITP for magnetic field strength  $B = 4$  T.

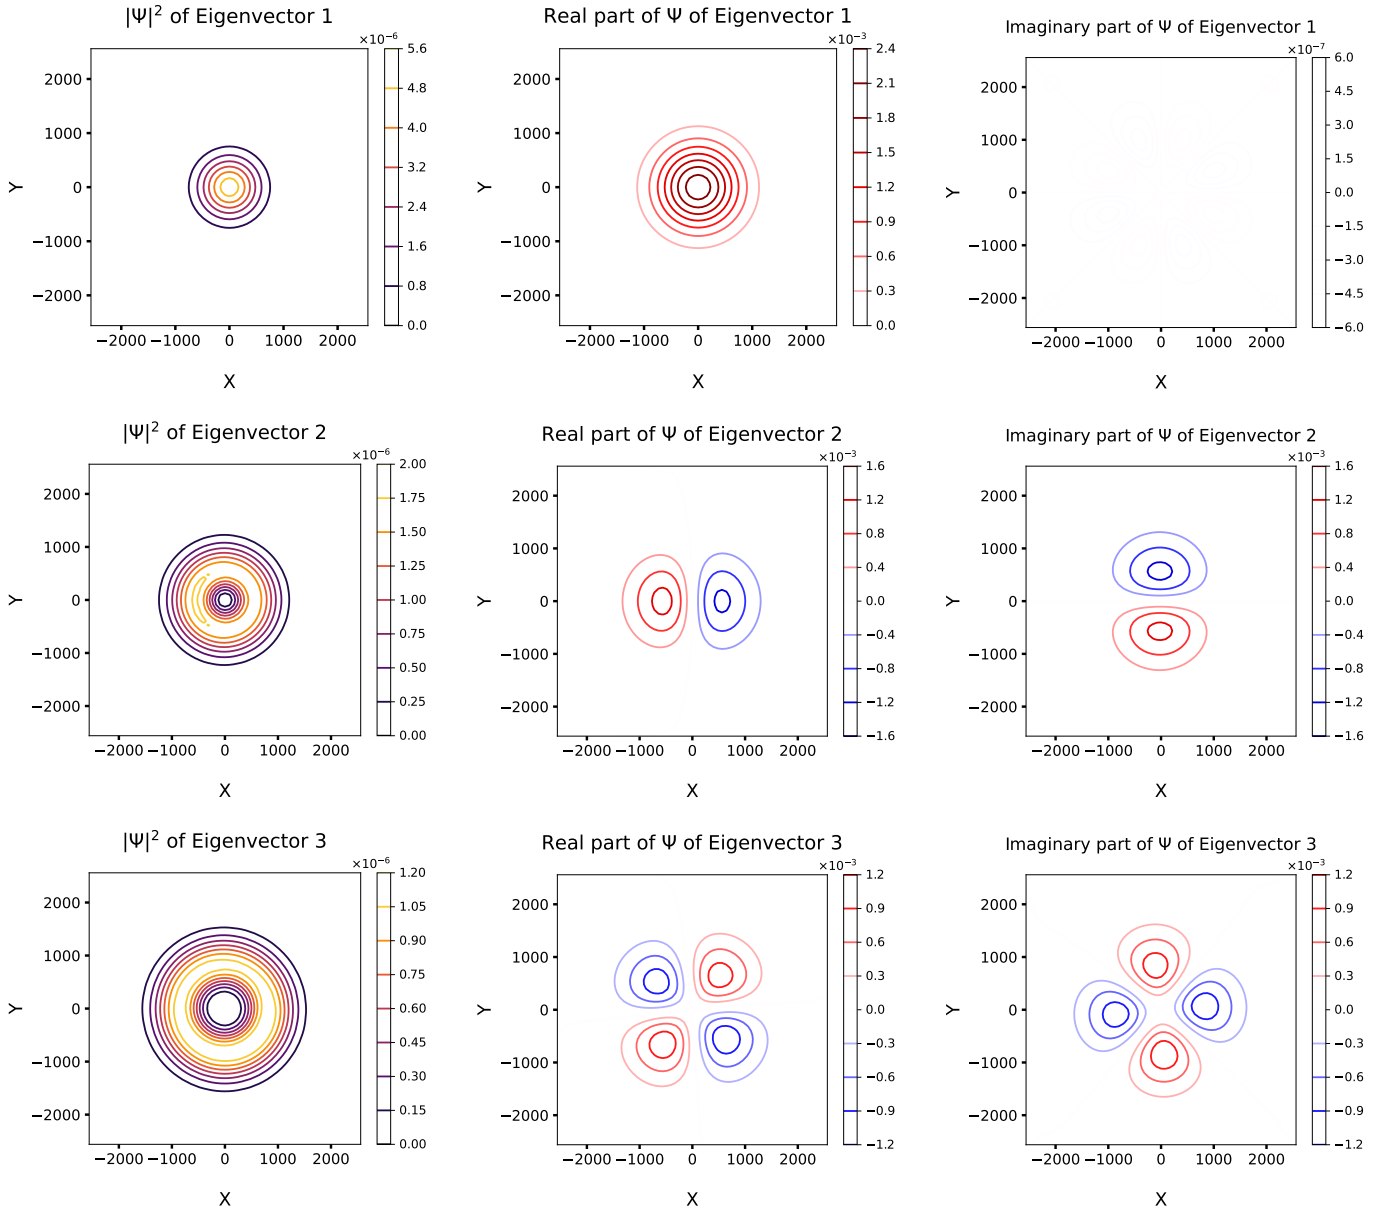

Figure 25: The probability density, real and imaginary contour plots of the 1st, 2nd and 3rd numerically obtained eigenfunctions obtained using ITP for magnetic field strength  $B = 5$  T.

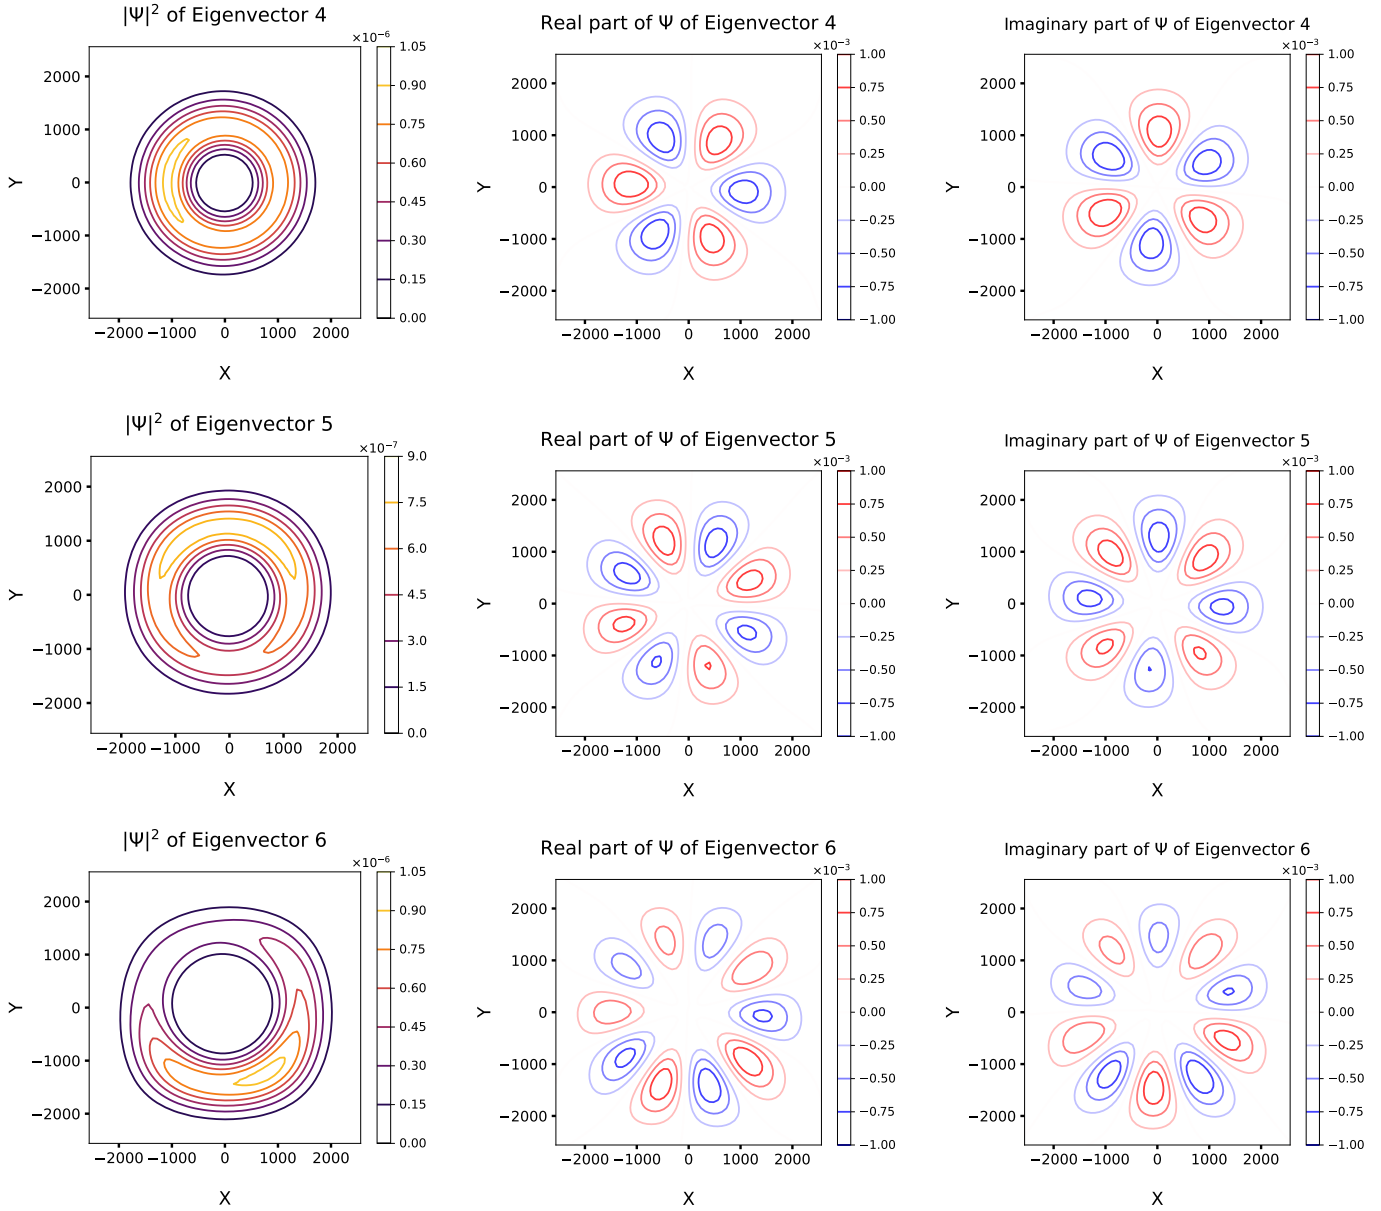

Figure 26: The probability density, real and imaginary contour plots of the 4th, 5th and 6th numerically obtained eigenfunctions obtained using ITP for magnetic field strength  $B = 5$  T.

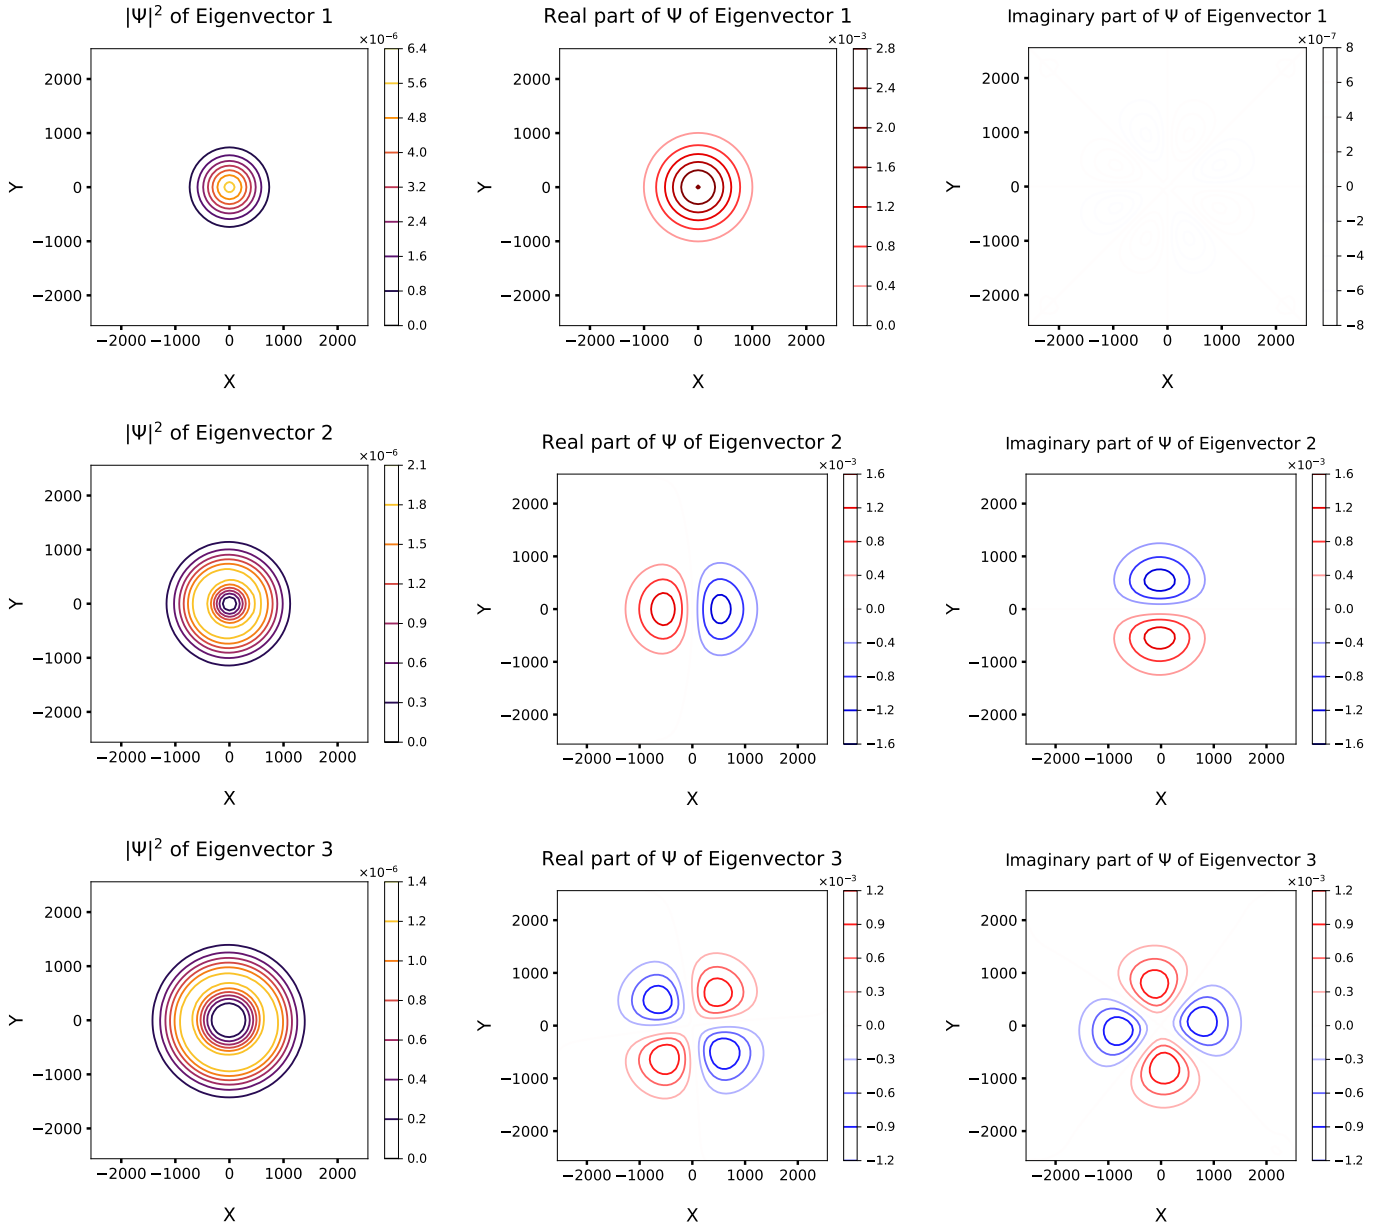

Figure 27: The probability density, real and imaginary contour plots of the 1st, 2nd and 3rd numerically obtained eigenfunctions obtained using ITP for magnetic field strength  $B = 6$  T.

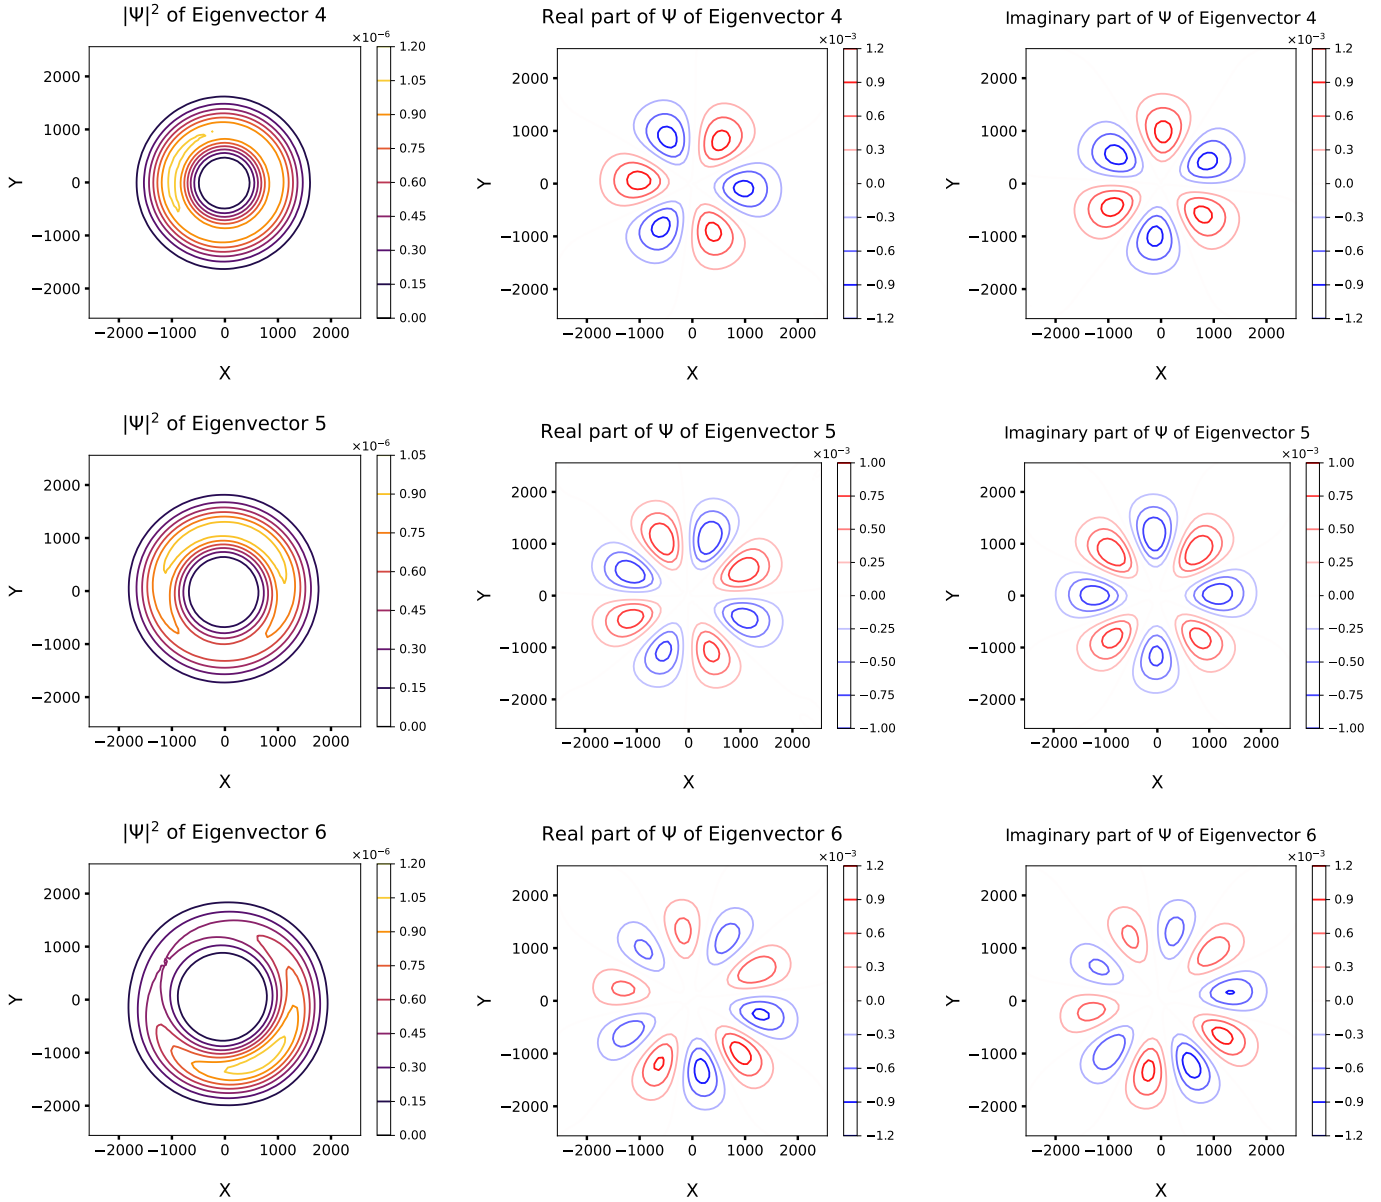

Figure 28: The probability density, real and imaginary contour plots of the 4th, 5th and 6th numerically obtained eigenfunctions obtained using ITP for magnetic field strength  $B = 6$  T.

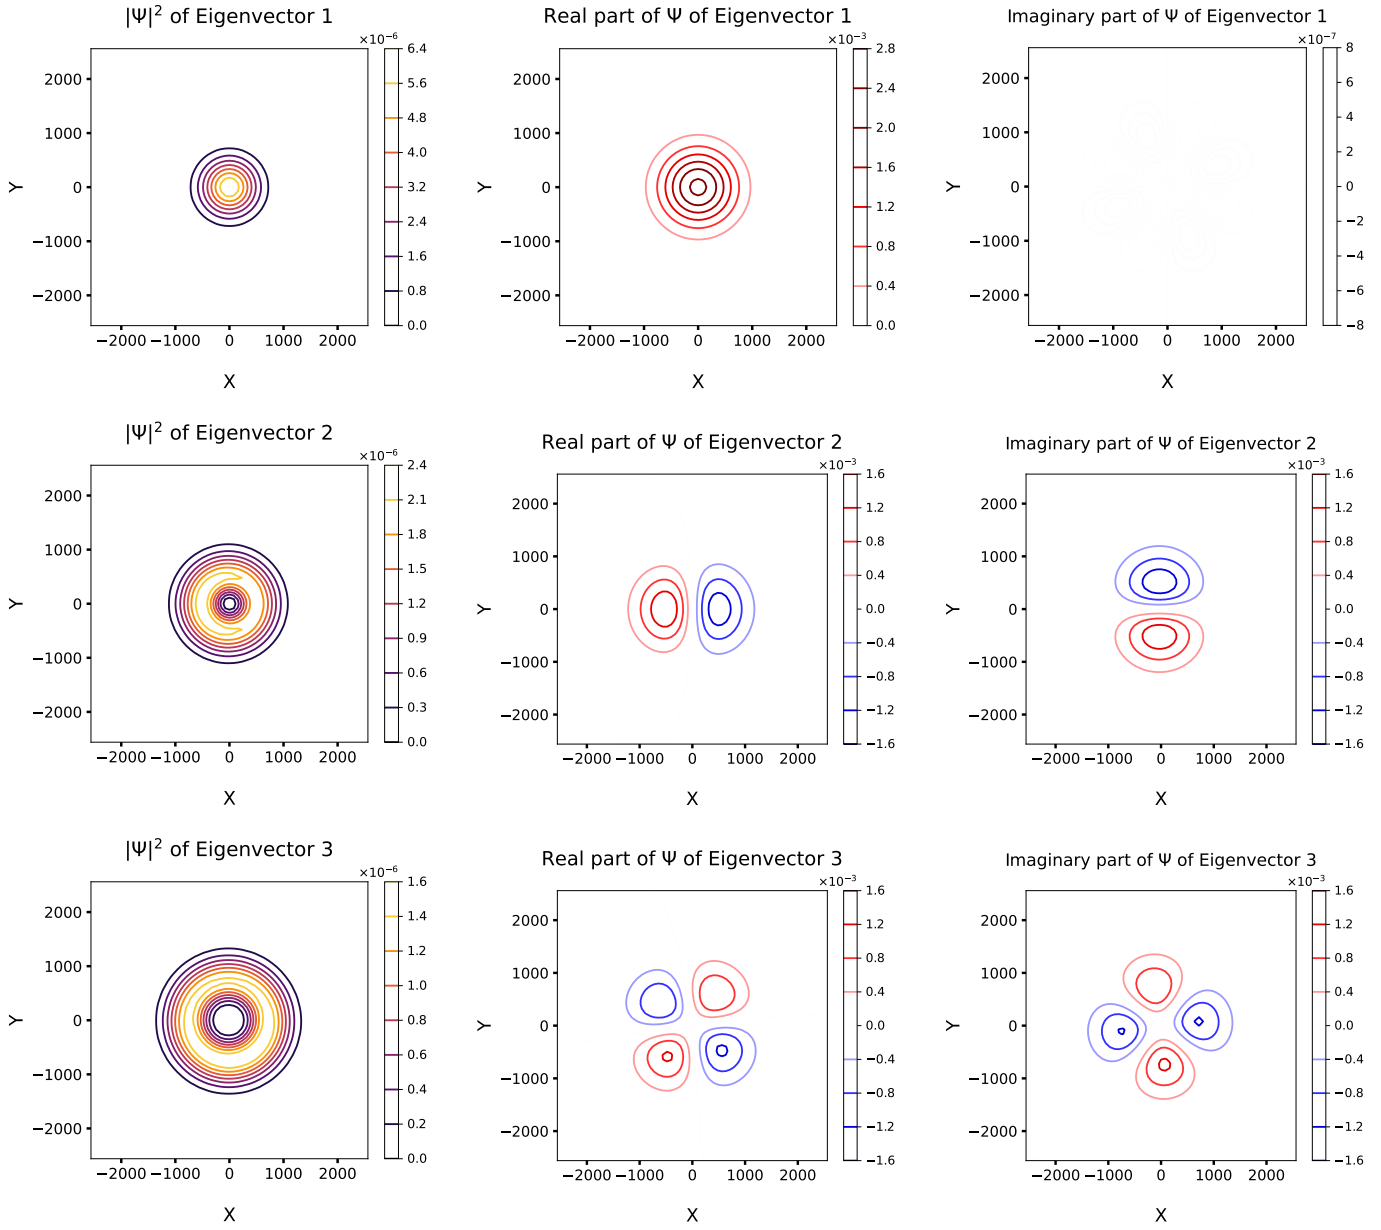

Figure 29: The probability density, real and imaginary contour plots of the 1st, 2nd and 3rd numerically obtained eigenfunctions obtained using ITP for magnetic field strength  $B = 7$  T.

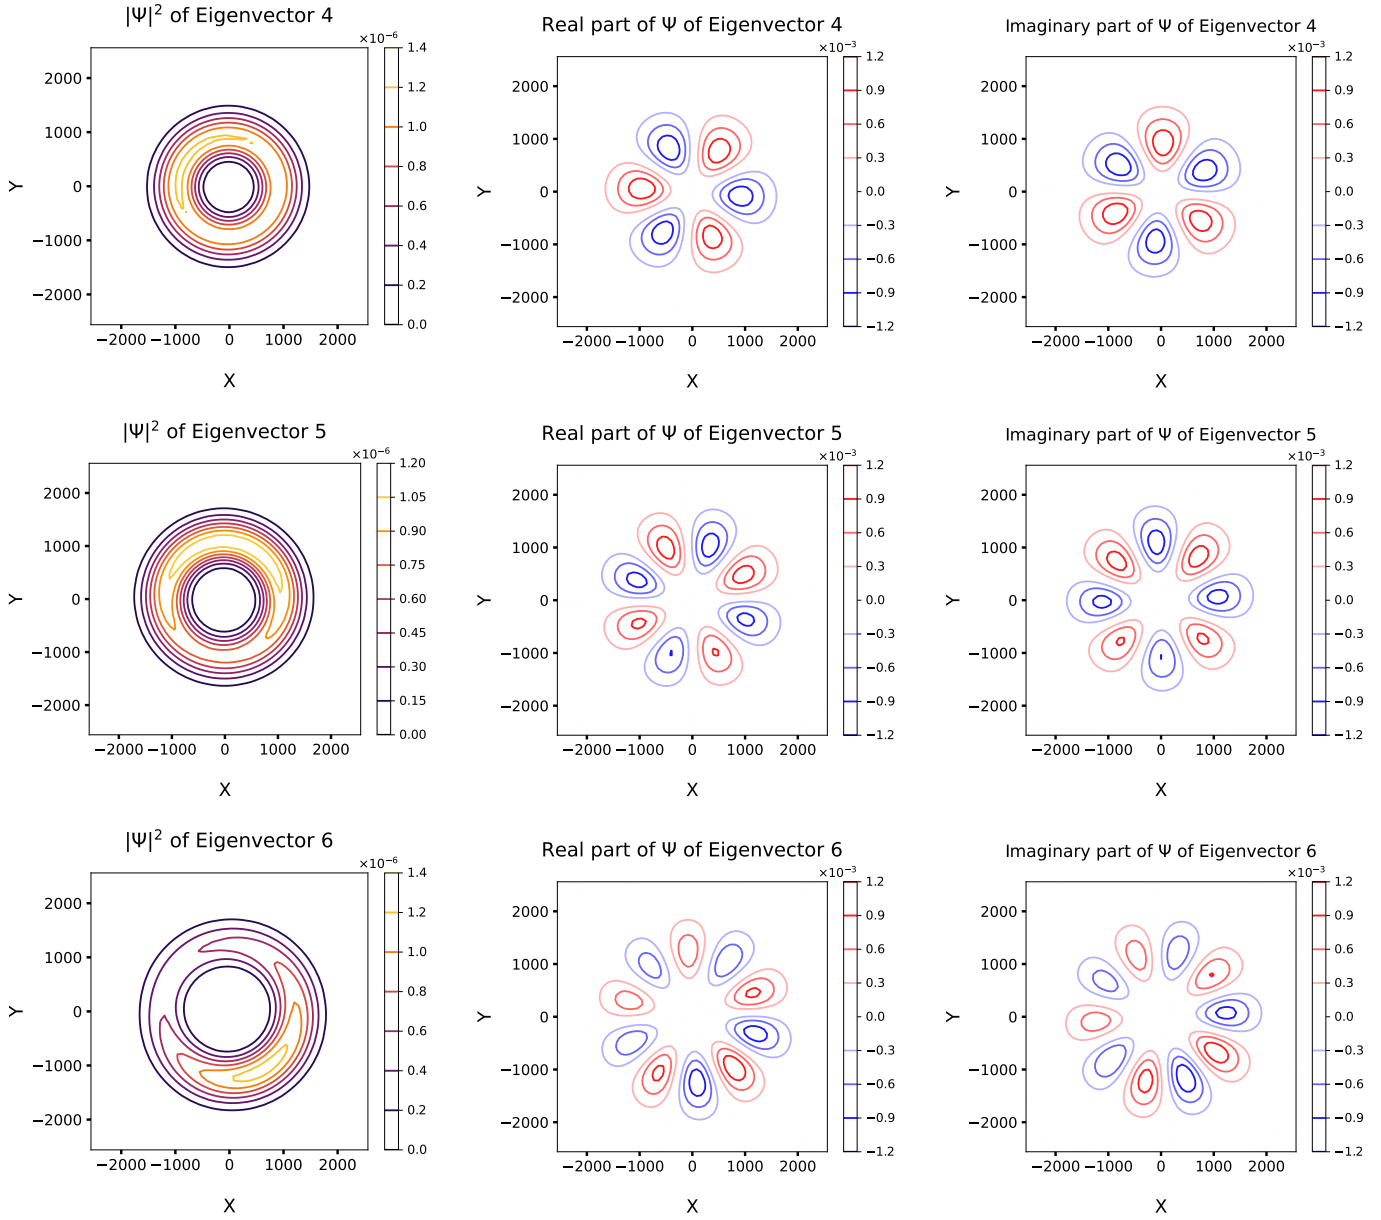

Figure 30: The probability density, real and imaginary contour plots of the 4th, 5th and 6th numerically obtained eigenfunctions obtained using ITP for magnetic field strength  $B = 7$  T.

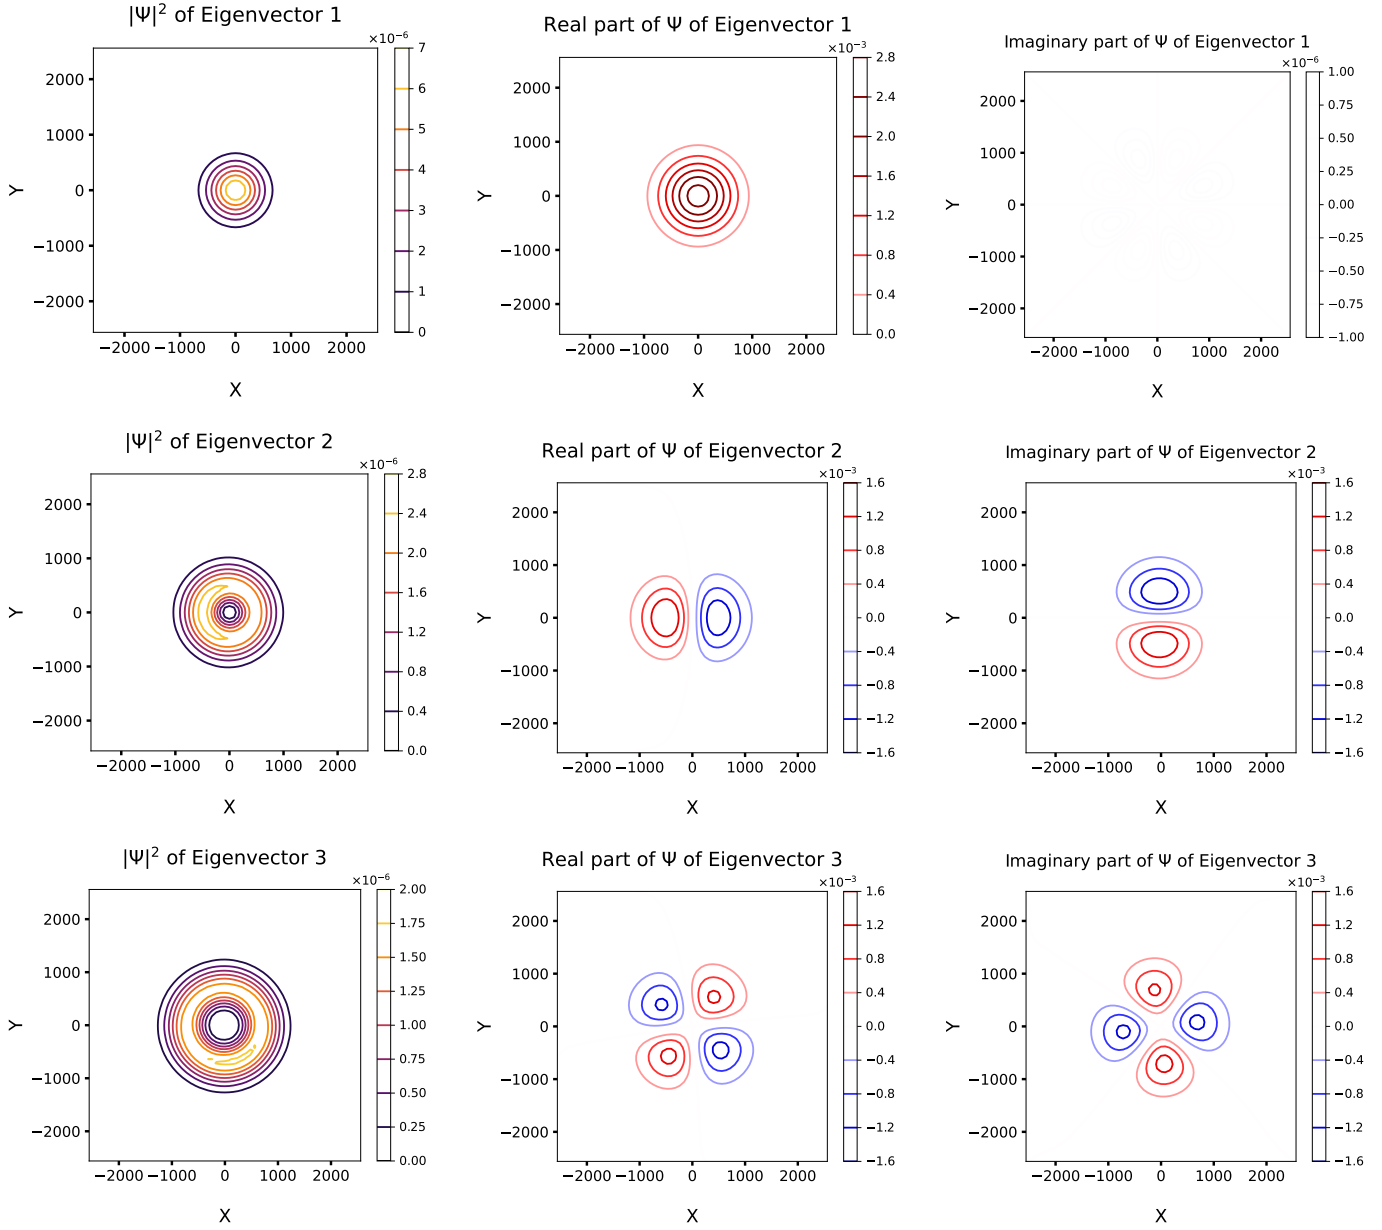

Figure 31: The probability density, real and imaginary contour plots of the 1st, 2nd and 3rd numerically obtained eigenfunctions obtained using ITP for magnetic field strength  $B = 8$  T.

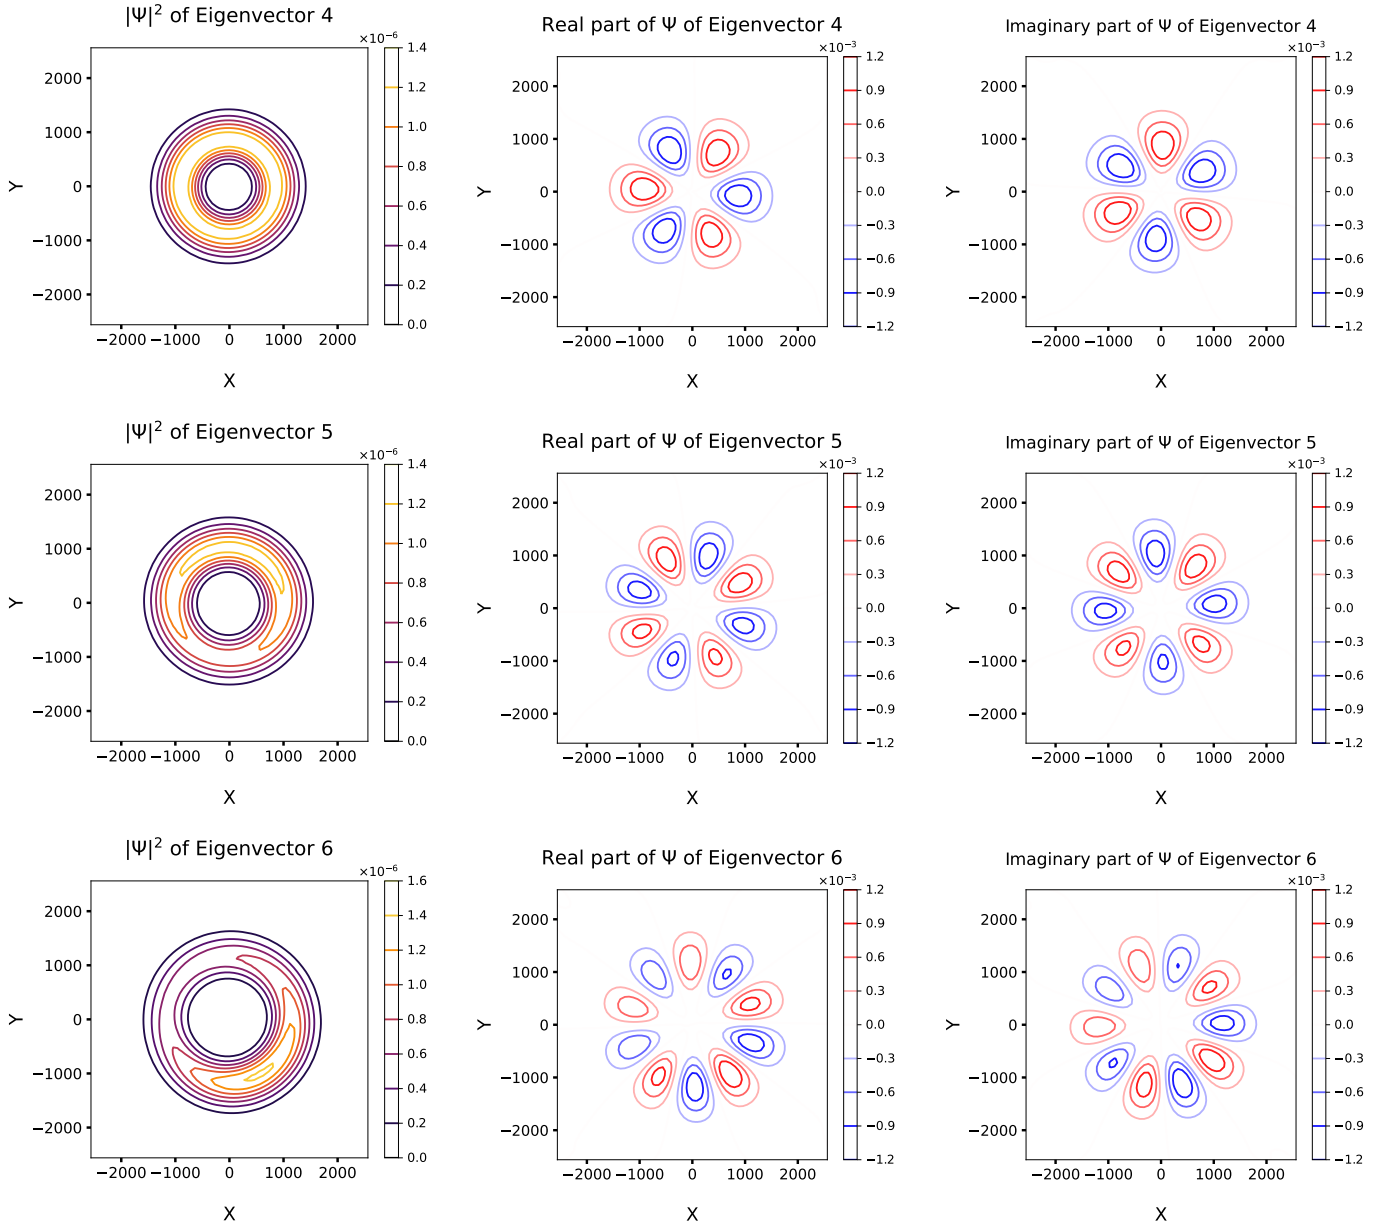

Figure 32: The probability density, real and imaginary contour plots of the 4th, 5th and 6th numerically obtained eigenfunctions obtained using ITP for magnetic field strength  $B = 8$  T.

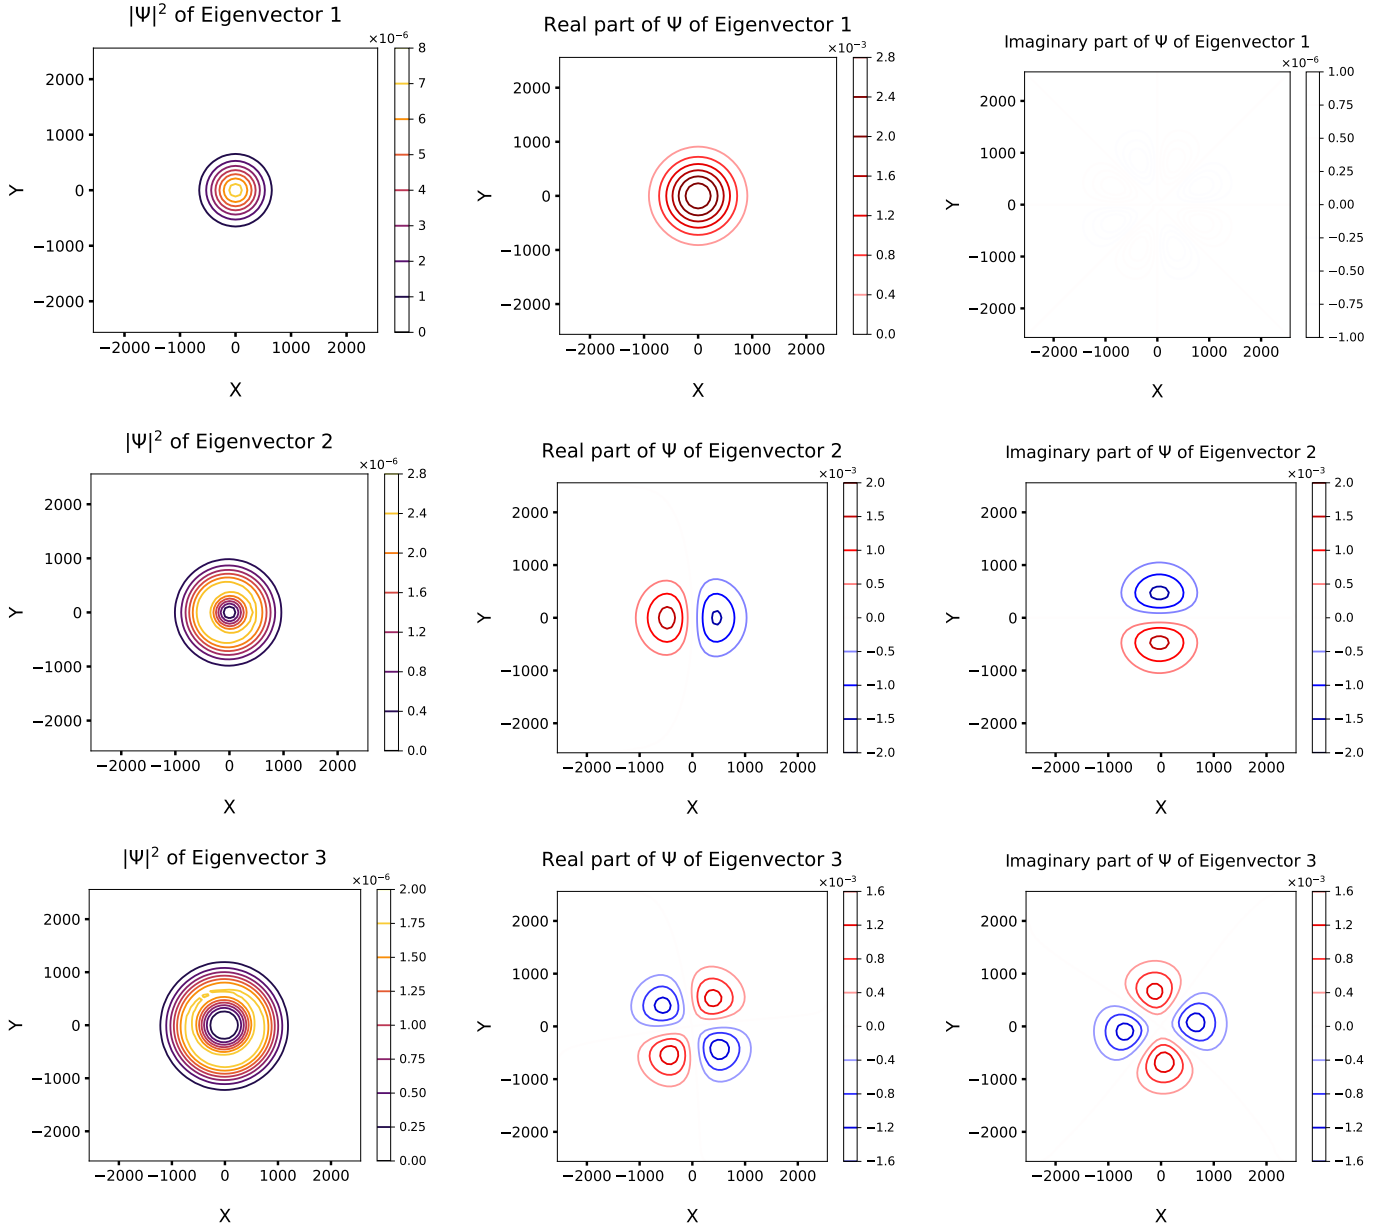

Figure 33: The probability density, real and imaginary contour plots of the 1st, 2nd and 3rd numerically obtained eigenfunctions obtained using ITP for magnetic field strength  $B = 9$  T.

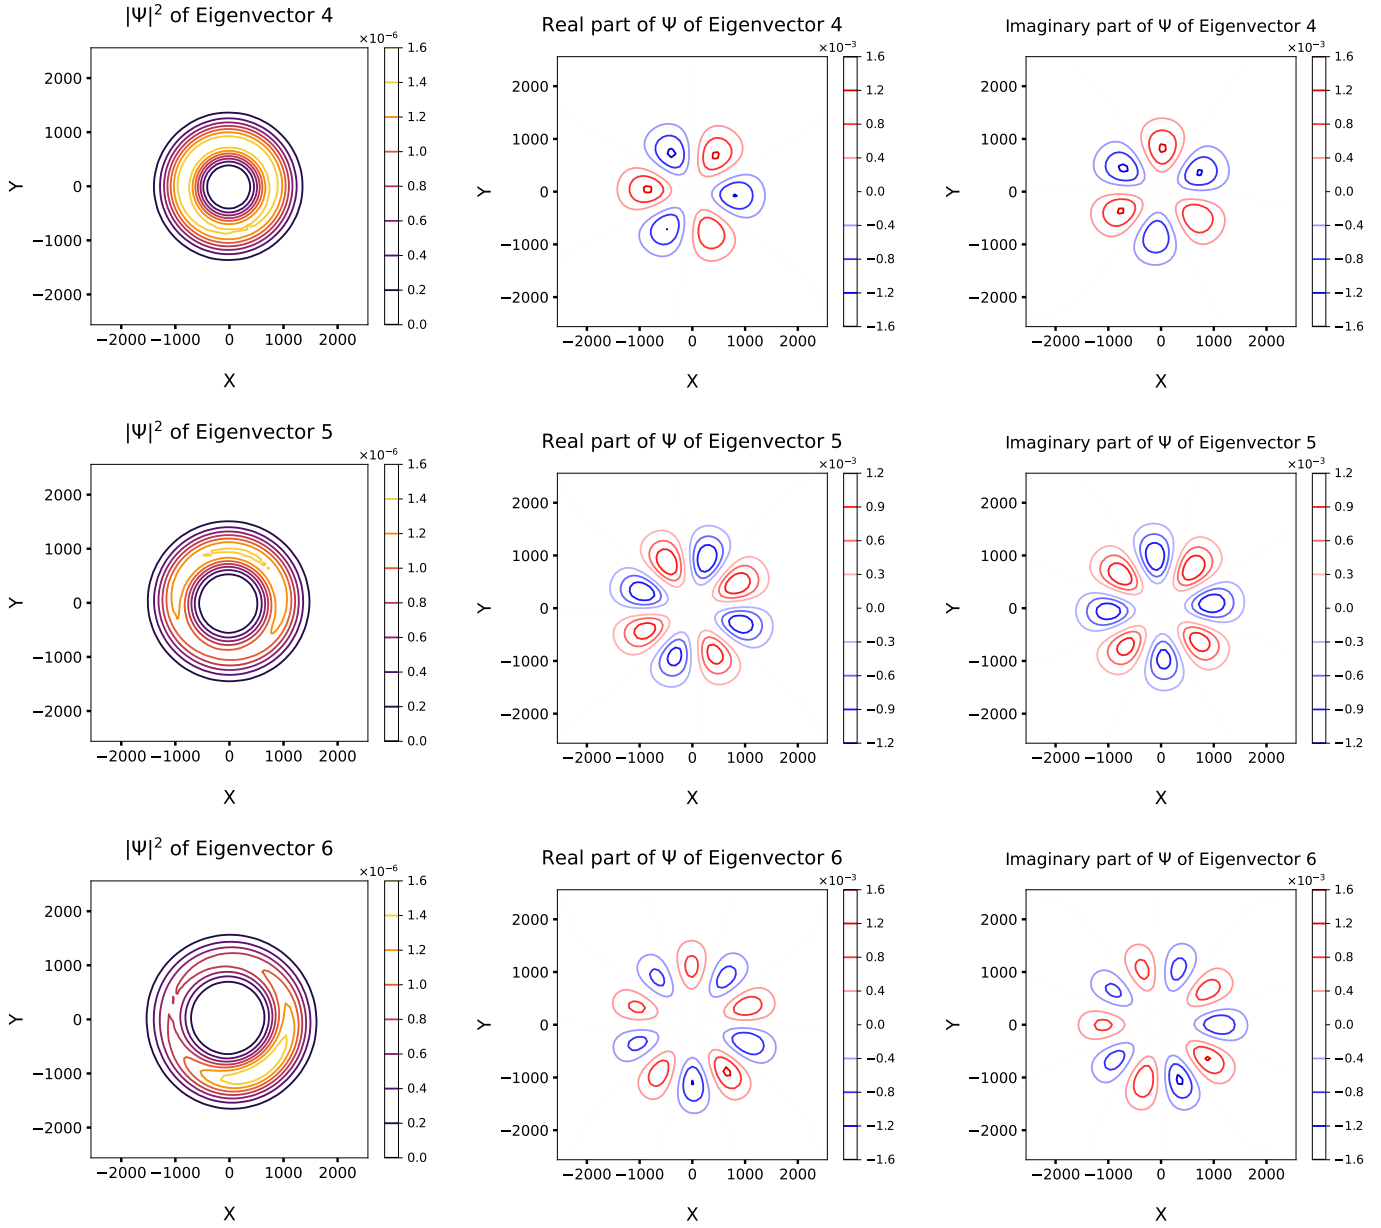

Figure 34: The probability density, real and imaginary contour plots of the 4th, 5th and 6th numerically obtained eigenfunctions obtained using ITP for magnetic field strength  $B = 9$  T.

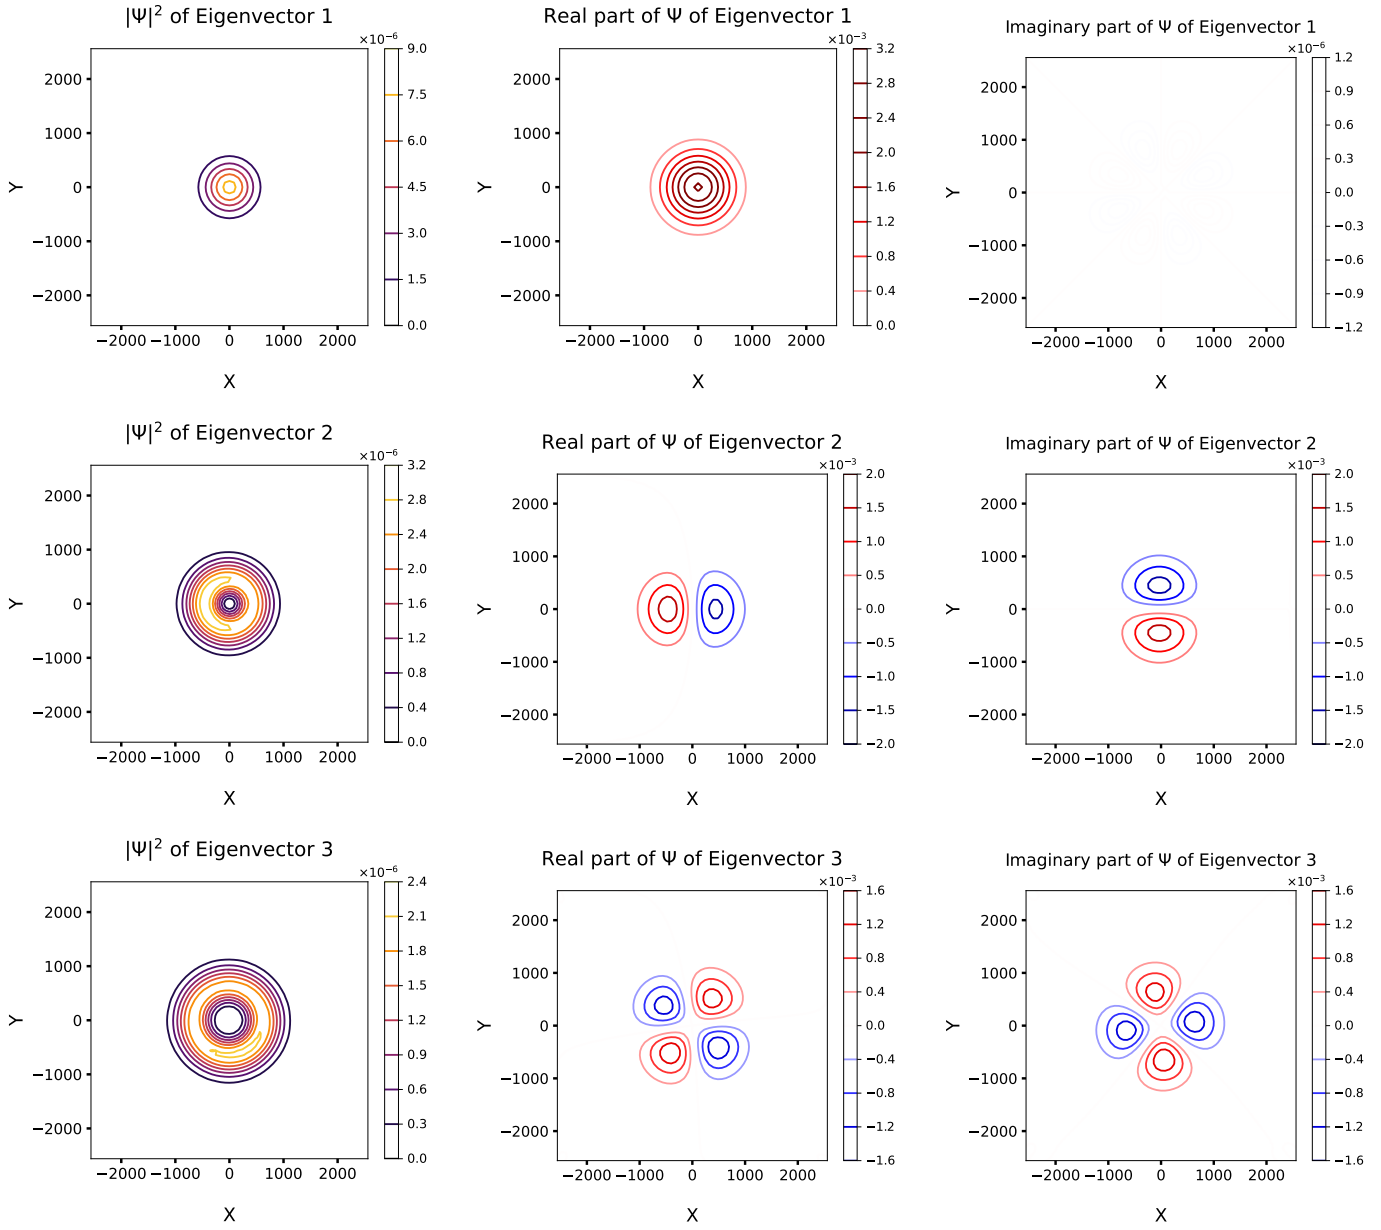

Figure 35: The probability density, real and imaginary contour plots of the 1st, 2nd and 3rd numerically obtained eigenfunctions obtained using ITP for magnetic field strength  $B = 10$  T.

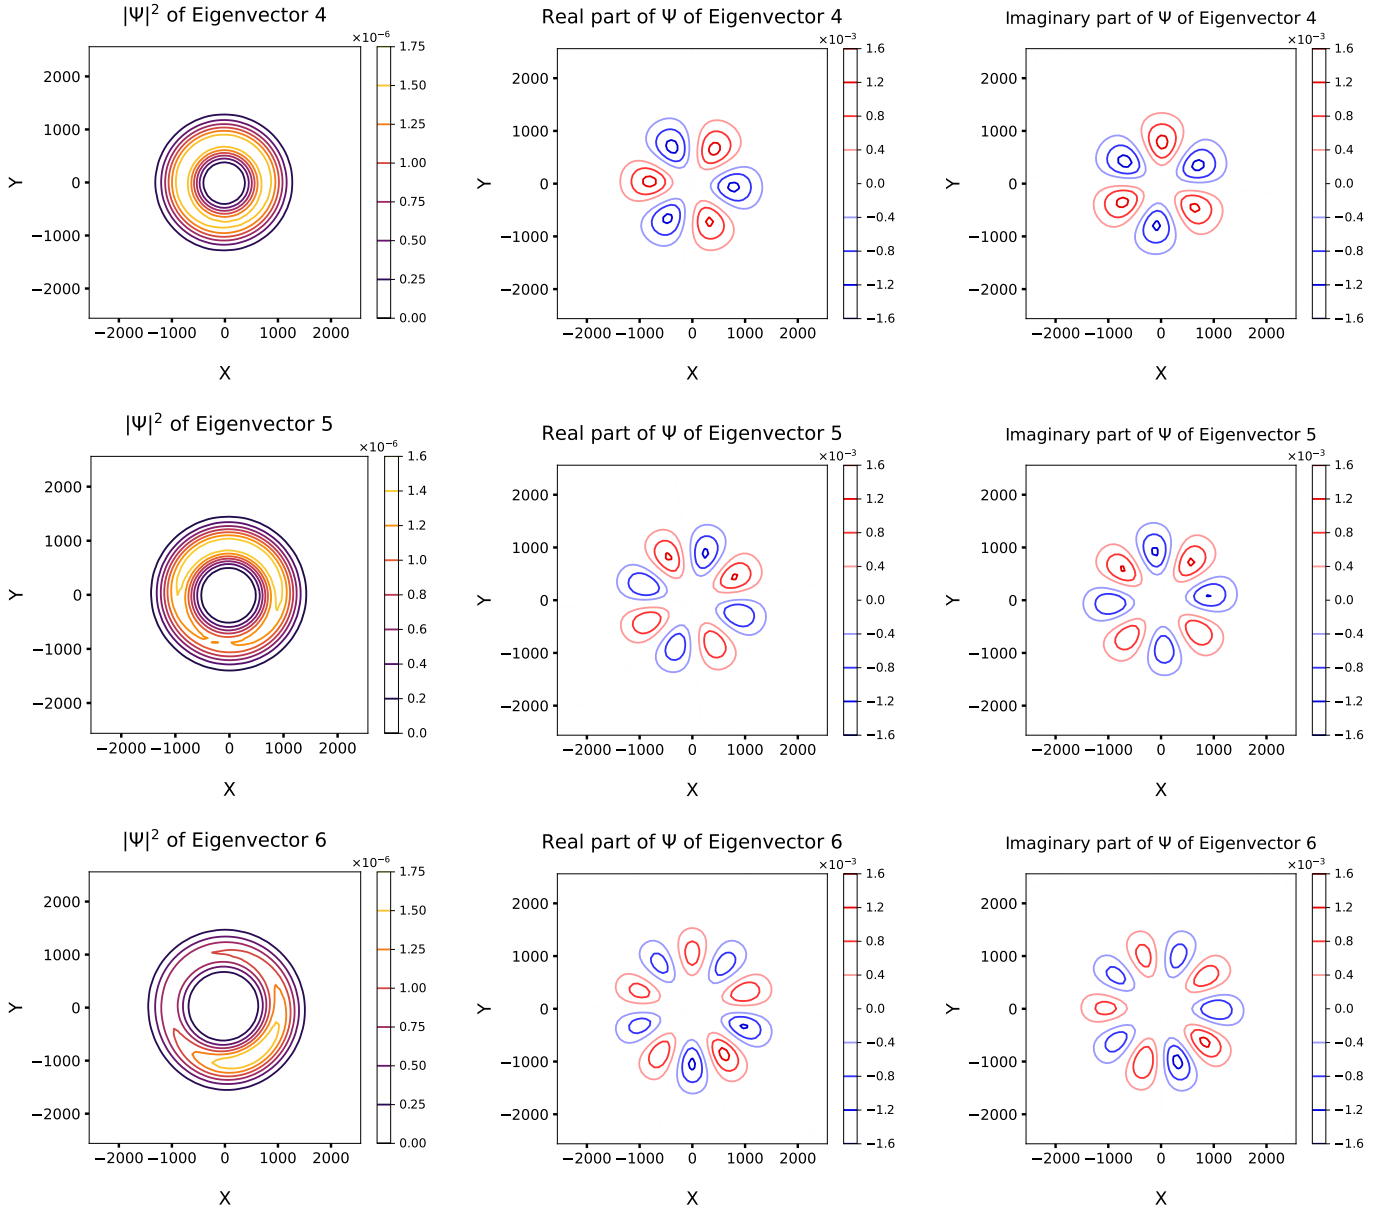

Figure 36: The probability density, real and imaginary contour plots of the 4th, 5th and 6th numerically obtained eigenfunctions obtained using ITP for magnetic field strength  $B = 10$  T.
